# Supplementary material for: Life cycle assessment of chitosan modified Ni–Fe layered double hydroxide for arsenic(iii) sequestration in aqueous medium: comparison of the impacts of adsorbent recycling, instrument use and source of energy
Source: Royal Society of Chemistry journal article supplement (doi:10.1039/d3va00312d), 2024-01-01
Supplement: d3va00312d1.pdf [file d3va00312d1.pdf]

1 **Life Cycle Assessment of Chitosan modified Ni-Fe Layered Double Hydroxide for**  
2 **adsorptive removal of Arsenic(III) from water: Comparison on the impacts of**  
3 **adsorbent recycling, instrument use and source of energy**

4 Kavya Bisaria<sup>1</sup>, Chandra Shekhar Seth<sup>2</sup>, Rachana Singh<sup>1\*</sup>

5 <sup>1</sup> Amity Institute of Biotechnology, Amity University Uttar Pradesh, Noida, India

6 <sup>2</sup>Department of Botany, University of Delhi, Delhi-110007, India

---

7  
8 \*Corresponding author

9 **The name of corresponding authors, address, telephone number and E-mail address:**

10 Prof. (Dr.) Rachana Singh

11 Amity Institute of Biotechnology,

12 Amity University Uttar Pradesh, Sector 125,

13 Noida, Uttar Pradesh-201313, India;

14 E-mail address: [rsingh2@amity.edu](mailto:rsingh2@amity.edu) ;

15 Phone: +91 9810557475; Fax: +91 120 4392295.

16

17 **Table S1: Category wise impacts associated with the use of magnetic stirrer for As(III)**  
 18 **removal by Ni-Fe LDH/Ch**

| Name                                                                                                                               | Category                                                                                                                                  | Impact result | Unit                 |
|------------------------------------------------------------------------------------------------------------------------------------|-------------------------------------------------------------------------------------------------------------------------------------------|---------------|----------------------|
| <b>human toxicity: non-carcinogenic - human toxicity potential (HTPnc)</b>                                                         |                                                                                                                                           | <b>102.85</b> | <b>kg 1,4-DCB-Eq</b> |
| market for nickel concentrate, 16% Ni   nickel concentrate, 16% Ni   Consequential, S - GLO                                        | 242:Manufacture of basic precious and other non-ferrous metals / 2420:Manufacture of basic precious and other non-ferrous metals          | 58.88         | kg 1,4-DCB-Eq        |
| market for electricity, medium voltage   electricity, medium voltage   Consequential, S - IN-Northern grid                         | 351:Electric power generation, transmission and distribution / 3510:Electric power generation, transmission and distribution              | 32.76         | kg 1,4-DCB-Eq        |
| ammonia production, steam reforming, liquid   ammonia, anhydrous, liquid   Consequential, S - UN-SEASIA                            | 201:Manufacture of basic chemicals, fertilizers and nitrogen compounds, plastics / 2012:Manufacture of fertilizers and nitrogen compounds | 3.32          | kg 1,4-DCB-Eq        |
| nitric oxide production   nitric oxide   Consequential, S - GLO                                                                    | 201:Manufacture of basic chemicals, fertilizers and nitrogen compounds, plastics / 2011:Manufacture of basic chemicals                    | 2.71          | kg 1,4-DCB-Eq        |
| urea production   urea   Consequential, S - CN                                                                                     | 201:Manufacture of basic chemicals, fertilizers and nitrogen compounds, plastics / 2012:Manufacture of fertilizers and nitrogen compounds | 2.44          | kg 1,4-DCB-Eq        |
| nitric acid production, product in 50% solution state   nitric acid, without water, in 50% solution state   Consequential, S - RoW | 201:Manufacture of basic chemicals, fertilizers and nitrogen compounds, plastics / 2012:Manufacture of fertilizers and nitrogen compounds | 2.38          | kg 1,4-DCB-Eq        |
| <b>ecotoxicity: terrestrial - terrestrial ecotoxicity potential (TETP)</b>                                                         |                                                                                                                                           | <b>113.22</b> | <b>kg 1,4-DCB-Eq</b> |
| ammonia production, steam reforming, liquid   ammonia, anhydrous, liquid   Consequential, S - UN-SEASIA                            | 201:Manufacture of basic chemicals, fertilizers and nitrogen compounds, plastics / 2012:Manufacture of fertilizers and nitrogen compounds | 30.14         | kg 1,4-DCB-Eq        |
| market for electricity, medium voltage   electricity, medium voltage   Consequential, S - IN-Northern grid                         | 351:Electric power generation, transmission and distribution / 3510:Electric power generation, transmission and distribution              | 27.34         | kg 1,4-DCB-Eq        |

|                                                                                                                                    |                                                                                                                                           |             |                      |
|------------------------------------------------------------------------------------------------------------------------------------|-------------------------------------------------------------------------------------------------------------------------------------------|-------------|----------------------|
| nitric oxide production   nitric oxide   Consequential, S - GLO                                                                    | 201:Manufacture of basic chemicals, fertilizers and nitrogen compounds, plastics / 2011:Manufacture of basic chemicals                    | 13.88       | kg 1,4-DCB-Eq        |
| market for nickel concentrate, 16% Ni   nickel concentrate, 16% Ni   Consequential, S - GLO                                        | 242:Manufacture of basic precious and other non-ferrous metals / 2420:Manufacture of basic precious and other non-ferrous metals          | 13.65       | kg 1,4-DCB-Eq        |
| urea production   urea   Consequential, S - CN                                                                                     | 201:Manufacture of basic chemicals, fertilizers and nitrogen compounds, plastics / 2012:Manufacture of fertilizers and nitrogen compounds | 13.15       | kg 1,4-DCB-Eq        |
| nitric acid production, product in 50% solution state   nitric acid, without water, in 50% solution state   Consequential, S - RoW | 201:Manufacture of basic chemicals, fertilizers and nitrogen compounds, plastics / 2012:Manufacture of fertilizers and nitrogen compounds | 12.15       | kg 1,4-DCB-Eq        |
| acetic acid production, product in 98% solution state   acetic acid, without water, in 98% solution state   Consequential, S - RER | 201:Manufacture of basic chemicals, fertilizers and nitrogen compounds, plastics / 2011:Manufacture of basic chemicals                    | 2.67        | kg 1,4-DCB-Eq        |
| <b>material resources: metals/minerals - surplus ore potential (SOP)</b>                                                           |                                                                                                                                           | <b>2.68</b> | <b>kg Cu-Eq</b>      |
| ionising radiation - ionising radiation potential (IRP)                                                                            |                                                                                                                                           | 0.8         | kBq Co-60-Eq         |
| photochemical oxidant formation: human health - photochemical oxidant formation potential: humans (HOFP)                           |                                                                                                                                           | 0.12        | kg NOx-Eq            |
| water use - water consumption potential (WCP)                                                                                      |                                                                                                                                           | 0.62        | m3                   |
| <b>ecotoxicity: freshwater - freshwater ecotoxicity potential (FETP)</b>                                                           |                                                                                                                                           | <b>6.54</b> | <b>kg 1,4-DCB-Eq</b> |
| market for nickel concentrate, 16% Ni   nickel concentrate, 16% Ni   Consequential, S - GLO                                        | 242:Manufacture of basic precious and other non-ferrous metals / 2420:Manufacture of basic precious and other non-ferrous metals          | 5.23        | kg 1,4-DCB-Eq        |
| market for electricity, medium voltage   electricity, medium voltage   Consequential, S - IN-Northern grid                         | 351:Electric power generation, transmission and distribution / 3510:Electric power generation, transmission and distribution              | 0.88        | kg 1,4-DCB-Eq        |
| ammonia production, steam reforming, liquid   ammonia, anhydrous,                                                                  | 201:Manufacture of basic chemicals, fertilizers and nitrogen compounds, plastics / 2012:Manufacture of fertilizers                        | 0.18        | kg 1,4-DCB-Eq        |

|                                                                                                                                    |                                                                                                                                           |             |                      |
|------------------------------------------------------------------------------------------------------------------------------------|-------------------------------------------------------------------------------------------------------------------------------------------|-------------|----------------------|
| liquid   Consequential, S - UN-SEASIA                                                                                              | and nitrogen compounds                                                                                                                    |             |                      |
| urea production   urea   Consequential, S - CN                                                                                     | 201:Manufacture of basic chemicals, fertilizers and nitrogen compounds, plastics / 2012:Manufacture of fertilizers and nitrogen compounds | 0.084165    | kg 1,4-DCB-Eq        |
| nitric oxide production   nitric oxide   Consequential, S - GLO                                                                    | 201:Manufacture of basic chemicals, fertilizers and nitrogen compounds, plastics / 2011:Manufacture of basic chemicals                    | 0.076527    | kg 1,4-DCB-Eq        |
| nitric acid production, product in 50% solution state   nitric acid, without water, in 50% solution state   Consequential, S - RoW | 201:Manufacture of basic chemicals, fertilizers and nitrogen compounds, plastics / 2012:Manufacture of fertilizers and nitrogen compounds | 0.069941    | kg 1,4-DCB-Eq        |
| <b>human toxicity: carcinogenic - human toxicity potential (HTPc)</b>                                                              |                                                                                                                                           | <b>2.53</b> | <b>kg 1,4-DCB-Eq</b> |
| market for electricity, medium voltage   electricity, medium voltage   Consequential, S - IN-Northern grid                         | 351:Electric power generation, transmission and distribution / 3510:Electric power generation, transmission and distribution              | 1.57        | kg 1,4-DCB-Eq        |
| market for nickel concentrate, 16% Ni   nickel concentrate, 16% Ni   Consequential, S - GLO                                        | 242:Manufacture of basic precious and other non-ferrous metals / 2420:Manufacture of basic precious and other non-ferrous metals          | 0.59        | kg 1,4-DCB-Eq        |
| urea production   urea   Consequential, S - CN                                                                                     | 201:Manufacture of basic chemicals, fertilizers and nitrogen compounds, plastics / 2012:Manufacture of fertilizers and nitrogen compounds | 0.098174    | kg 1,4-DCB-Eq        |
| nitric oxide production   nitric oxide   Consequential, S - GLO                                                                    | 201:Manufacture of basic chemicals, fertilizers and nitrogen compounds, plastics / 2011:Manufacture of basic chemicals                    | 0.095028    | kg 1,4-DCB-Eq        |
| ammonia production, steam reforming, liquid   ammonia, anhydrous, liquid   Consequential, S - UN-SEASIA                            | 201:Manufacture of basic chemicals, fertilizers and nitrogen compounds, plastics / 2012:Manufacture of fertilizers and nitrogen compounds | 0.086393    | kg 1,4-DCB-Eq        |
| nitric acid production, product in 50% solution state   nitric acid, without water, in 50% solution state   Consequential, S - RoW | 201:Manufacture of basic chemicals, fertilizers and nitrogen compounds, plastics / 2012:Manufacture of fertilizers and nitrogen compounds | 0.078903    | kg 1,4-DCB-Eq        |
| photochemical oxidant formation: terrestrial ecosystems - photochemical oxidant formation potential: ecosystems (EOPF)             |                                                                                                                                           | 0.13        | kg NOx-              |

|                                                                                                                                    |                                                                                                                                           |                 |                      |
|------------------------------------------------------------------------------------------------------------------------------------|-------------------------------------------------------------------------------------------------------------------------------------------|-----------------|----------------------|
|                                                                                                                                    |                                                                                                                                           |                 | Eq                   |
| <b>eutrophication: marine - marine eutrophication potential (MEP)</b>                                                              |                                                                                                                                           | <b>0.002737</b> | <b>kg N-Eq</b>       |
| market for electricity, medium voltage   electricity, medium voltage   Consequential, S - IN-Northern grid                         | 351:Electric power generation, transmission and distribution / 3510:Electric power generation, transmission and distribution              | 0.001459        | kg N-Eq              |
| market for wastewater, average   wastewater, average   Consequential, S - RoW                                                      | 370:Sewerage / 3700:Sewerage                                                                                                              | 0.000562        | kg N-Eq              |
| urea production   urea   Consequential, S - CN                                                                                     | 201:Manufacture of basic chemicals, fertilizers and nitrogen compounds, plastics / 2012:Manufacture of fertilizers and nitrogen compounds | 0.000306        | kg N-Eq              |
| ammonia production, steam reforming, liquid   ammonia, anhydrous, liquid   Consequential, S - UN-SEASIA                            | 201:Manufacture of basic chemicals, fertilizers and nitrogen compounds, plastics / 2012:Manufacture of fertilizers and nitrogen compounds | 0.000206        | kg N-Eq              |
| nitric acid production, product in 50% solution state   nitric acid, without water, in 50% solution state   Consequential, S - RoW | 201:Manufacture of basic chemicals, fertilizers and nitrogen compounds, plastics / 2012:Manufacture of fertilizers and nitrogen compounds | 0.000174        | kg N-Eq              |
| nitric oxide production   nitric oxide   Consequential, S - GLO                                                                    | 201:Manufacture of basic chemicals, fertilizers and nitrogen compounds, plastics / 2011:Manufacture of basic chemicals                    | 0.000111        | kg N-Eq              |
| market for nickel concentrate, 16% Ni   nickel concentrate, 16% Ni   Consequential, S - GLO                                        | 242:Manufacture of basic precious and other non-ferrous metals / 2420:Manufacture of basic precious and other non-ferrous metals          | -1E-04          | kg N-Eq              |
| <b>energy resources: non-renewable, fossil - fossil fuel potential (FFP)</b>                                                       |                                                                                                                                           | <b>16.73</b>    | <b>kg oil-Eq</b>     |
| <b>ecotoxicity: marine - marine ecotoxicity potential (METP)</b>                                                                   |                                                                                                                                           | <b>8.36</b>     | <b>kg 1,4-DCB-Eq</b> |
| market for nickel concentrate, 16% Ni   nickel concentrate, 16% Ni   Consequential, S - GLO                                        | 242:Manufacture of basic precious and other non-ferrous metals / 2420:Manufacture of basic precious and other non-ferrous metals          | 6.59            | kg 1,4-DCB-Eq        |
| market for electricity, medium voltage   electricity, medium voltage   Consequential, S                                            | 351:Electric power generation, transmission and distribution / 3510:Electric power generation, transmission and distribution              | 1.19            | kg 1,4-DCB-Eq        |

|                                                                                                                                    |                                                                                                                                           |                 |                     |
|------------------------------------------------------------------------------------------------------------------------------------|-------------------------------------------------------------------------------------------------------------------------------------------|-----------------|---------------------|
| - IN-Northern grid                                                                                                                 |                                                                                                                                           |                 |                     |
| ammonia production, steam reforming, liquid   ammonia, anhydrous, liquid   Consequential, S - UN-SEASIA                            | 201:Manufacture of basic chemicals, fertilizers and nitrogen compounds, plastics / 2012:Manufacture of fertilizers and nitrogen compounds | 0.24            | kg 1,4-DCB-Eq       |
| urea production   urea   Consequential, S - CN                                                                                     | 201:Manufacture of basic chemicals, fertilizers and nitrogen compounds, plastics / 2012:Manufacture of fertilizers and nitrogen compounds | 0.12            | kg 1,4-DCB-Eq       |
| nitric oxide production   nitric oxide   Consequential, S - GLO                                                                    | 201:Manufacture of basic chemicals, fertilizers and nitrogen compounds, plastics / 2011:Manufacture of basic chemicals                    | 0.11            | kg 1,4-DCB-Eq       |
| nitric acid production, product in 50% solution state   nitric acid, without water, in 50% solution state   Consequential, S - RoW | 201:Manufacture of basic chemicals, fertilizers and nitrogen compounds, plastics / 2012:Manufacture of fertilizers and nitrogen compounds | 0.097266        | kg 1,4-DCB-Eq       |
| <b>ozone depletion - ozone depletion potential (ODP<sub>infinite</sub>)</b>                                                        |                                                                                                                                           | 0.000124        | <b>kg CFC-11-Eq</b> |
| <b>particulate matter formation - particulate matter formation potential (PMFP)</b>                                                |                                                                                                                                           | 0.11            | <b>kg PM2.5-Eq</b>  |
| acidification: terrestrial - terrestrial acidification potential (TAP)                                                             |                                                                                                                                           | 0.25            | kg SO2-Eq           |
| <b>eutrophication: freshwater - freshwater eutrophication potential (FEP)</b>                                                      |                                                                                                                                           | <b>0.033779</b> | <b>kg P-Eq</b>      |
| market for electricity, medium voltage   electricity, medium voltage   Consequential, S - IN-Northern grid                         | 351:Electric power generation, transmission and distribution / 3510:Electric power generation, transmission and distribution              | 0.023223        | kg P-Eq             |
| market for nickel concentrate, 16% Ni   nickel concentrate, 16% Ni   Consequential, S - GLO                                        | 242:Manufacture of basic precious and other non-ferrous metals / 2420:Manufacture of basic precious and other non-ferrous metals          | 0.006358        | kg P-Eq             |
| nitric oxide production   nitric oxide   Consequential, S - GLO                                                                    | 201:Manufacture of basic chemicals, fertilizers and nitrogen compounds, plastics / 2011:Manufacture of basic chemicals                    | 0.00124         | kg P-Eq             |
| nitric acid production, product in 50% solution state   nitric acid, without water, in 50% solution state   Consequential, S -     | 201:Manufacture of basic chemicals, fertilizers and nitrogen compounds, plastics / 2012:Manufacture of fertilizers and nitrogen compounds | 0.001015        | kg P-Eq             |

|                                                                                                                                    |                                                                                                                                           |              |                  |
|------------------------------------------------------------------------------------------------------------------------------------|-------------------------------------------------------------------------------------------------------------------------------------------|--------------|------------------|
| RoW                                                                                                                                |                                                                                                                                           |              |                  |
| urea production   urea   Consequential, S - CN                                                                                     | 201:Manufacture of basic chemicals, fertilizers and nitrogen compounds, plastics / 2012:Manufacture of fertilizers and nitrogen compounds | 0.001004     | kg P-Eq          |
| ammonia production, steam reforming, liquid   ammonia, anhydrous, liquid   Consequential, S - UN-SEASIA                            | 201:Manufacture of basic chemicals, fertilizers and nitrogen compounds, plastics / 2012:Manufacture of fertilizers and nitrogen compounds | 0.000594     | kg P-Eq          |
| <b>climate change - global warming potential (GWP100)</b>                                                                          |                                                                                                                                           | <b>61.23</b> | <b>kg CO2-Eq</b> |
| market for electricity, medium voltage   electricity, medium voltage   Consequential, S - IN-Northern grid                         | 351:Electric power generation, transmission and distribution / 3510:Electric power generation, transmission and distribution              | 30.47        | kg CO2-Eq        |
| ammonia production, steam reforming, liquid   ammonia, anhydrous, liquid   Consequential, S - UN-SEASIA                            | 201:Manufacture of basic chemicals, fertilizers and nitrogen compounds, plastics / 2012:Manufacture of fertilizers and nitrogen compounds | 13.68        | kg CO2-Eq        |
| nitric acid production, product in 50% solution state   nitric acid, without water, in 50% solution state   Consequential, S - RoW | 201:Manufacture of basic chemicals, fertilizers and nitrogen compounds, plastics / 2012:Manufacture of fertilizers and nitrogen compounds | 5.24         | kg CO2-Eq        |
| nitric oxide production   nitric oxide   Consequential, S - GLO                                                                    | 201:Manufacture of basic chemicals, fertilizers and nitrogen compounds, plastics / 2011:Manufacture of basic chemicals                    | 4.99         | kg CO2-Eq        |
| urea production   urea   Consequential, S - CN                                                                                     | 201:Manufacture of basic chemicals, fertilizers and nitrogen compounds, plastics / 2012:Manufacture of fertilizers and nitrogen compounds | 3.84         | kg CO2-Eq        |
| market for nickel concentrate, 16% Ni   nickel concentrate, 16% Ni   Consequential, S - GLO                                        | 242:Manufacture of basic precious and other non-ferrous metals / 2420:Manufacture of basic precious and other non-ferrous metals          | 2.25         | kg CO2-Eq        |
| acetic acid production, product in 98% solution state   acetic acid, without water, in 98% solution state   Consequential, S - RER | 201:Manufacture of basic chemicals, fertilizers and nitrogen compounds, plastics / 2011:Manufacture of basic chemicals                    | 0.65         | kg CO2-Eq        |

20 **Table S2: Category wise impacts associated with the use of ultrasonicator for As(III)**  
 21 **removal by Ni-Fe LDH/Ch**

| Name                                                                                                                               | Category                                                                                                                                  | Inventor<br>y result | Unit | Impact<br>t<br>factor | Unit | Impact<br>result | Unit                      |
|------------------------------------------------------------------------------------------------------------------------------------|-------------------------------------------------------------------------------------------------------------------------------------------|----------------------|------|-----------------------|------|------------------|---------------------------|
| <b>acidification: terrestrial - terrestrial acidification potential (TAP)</b>                                                      |                                                                                                                                           |                      |      |                       |      | <b>0.25</b>      | <b>kg<br/>SO2-<br/>Eq</b> |
| ammonia production, steam reforming, liquid   ammonia, anhydrous, liquid   Consequential, S - UN-SEASIA                            | 201:Manufacture of basic chemicals, fertilizers and nitrogen compounds, plastics / 2012:Manufacture of fertilizers and nitrogen compounds |                      |      |                       |      | 0.006346         | kg<br>SO2-<br>Eq          |
| market for electricity, medium voltage   electricity, medium voltage   Consequential, S - IN-Northern grid                         | 351:Electric power generation, transmission and distribution / 3510:Electric power generation, transmission and distribution              |                      |      |                       |      | 0.096038         | kg<br>SO2-<br>Eq          |
| market for nickel concentrate, 16% Ni   nickel concentrate, 16% Ni   Consequential, S - GLO                                        | 242:Manufacture of basic precious and other non-ferrous metals / 2420:Manufacture of basic precious and other non-ferrous metals          |                      |      |                       |      | 0.007444         | kg<br>SO2-<br>Eq          |
| nitric acid production, product in 50% solution state   nitric acid, without water, in 50% solution state   Consequential, S - RoW | 201:Manufacture of basic chemicals, fertilizers and nitrogen compounds, plastics / 2012:Manufacture of fertilizers and nitrogen compounds |                      |      |                       |      | 0.014321         | kg<br>SO2-<br>Eq          |
| nitric oxide production   nitric oxide   Consequential, S - GLO                                                                    | 201:Manufacture of basic chemicals, fertilizers and nitrogen compounds, plastics / 2011:Manufacture of basic chemicals                    |                      |      |                       |      | 0.11             | kg<br>SO2-<br>Eq          |
| urea production   urea   Consequential, S - CN                                                                                     | 201:Manufacture of basic chemicals, fertilizers and nitrogen compounds, plastics / 2012:Manufacture of fertilizers and nitrogen compounds |                      |      |                       |      | 0.012731         | kg<br>SO2-<br>Eq          |
| <b>climate change - global warming potential (GWP100)</b>                                                                          |                                                                                                                                           |                      |      |                       |      | <b>62.58</b>     | <b>kg<br/>CO2-<br/>Eq</b> |
| acetic acid production, product in 98% solution state   acetic acid, without water, in 98% solution state                          | 201:Manufacture of basic chemicals, fertilizers and nitrogen compounds, plastics / 2011:Manufacture of basic chemicals                    |                      |      |                       |      | 0.65             | kg<br>CO2-<br>Eq          |



|                                                                                                                                    |                                                                                                                                           |             |                      |
|------------------------------------------------------------------------------------------------------------------------------------|-------------------------------------------------------------------------------------------------------------------------------------------|-------------|----------------------|
| Consequential, S - RER                                                                                                             |                                                                                                                                           |             |                      |
| ammonia production, steam reforming, liquid   ammonia, anhydrous, liquid   Consequential, S - UN-SEASIA                            | 201:Manufacture of basic chemicals, fertilizers and nitrogen compounds, plastics / 2012:Manufacture of fertilizers and nitrogen compounds | 13.68       | kg CO2-Eq            |
| market for electricity, medium voltage   electricity, medium voltage   Consequential, S - IN-Northern grid                         | 351:Electric power generation, transmission and distribution / 3510:Electric power generation, transmission and distribution              | 31.81       | kg CO2-Eq            |
| market for nickel concentrate, 16% Ni   nickel concentrate, 16% Ni   Consequential, S - GLO                                        | 242:Manufacture of basic precious and other non-ferrous metals / 2420:Manufacture of basic precious and other non-ferrous metals          | 2.25        | kg CO2-Eq            |
| nitric acid production, product in 50% solution state   nitric acid, without water, in 50% solution state   Consequential, S - RoW | 201:Manufacture of basic chemicals, fertilizers and nitrogen compounds, plastics / 2012:Manufacture of fertilizers and nitrogen compounds | 5.24        | kg CO2-Eq            |
| nitric oxide production   nitric oxide   Consequential, S - GLO                                                                    | 201:Manufacture of basic chemicals, fertilizers and nitrogen compounds, plastics / 2011:Manufacture of basic chemicals                    | 4.99        | kg CO2-Eq            |
| urea production   urea   Consequential, S - CN                                                                                     | 201:Manufacture of basic chemicals, fertilizers and nitrogen compounds, plastics / 2012:Manufacture of fertilizers and nitrogen compounds | 3.84        | kg CO2-Eq            |
| <b>ecotoxicity: freshwater - freshwater ecotoxicity potential (FETP)</b>                                                           |                                                                                                                                           | <b>6.58</b> | <b>kg 1,4-DCB-Eq</b> |
| ammonia production, steam reforming, liquid   ammonia, anhydrous, liquid   Consequential, S - UN-SEASIA                            | 201:Manufacture of basic chemicals, fertilizers and nitrogen compounds, plastics / 2012:Manufacture of fertilizers and nitrogen compounds | 0.18        | kg 1,4-DCB-Eq        |
| market for electricity, medium voltage   electricity, medium voltage   Consequential, S - IN-Northern grid                         | 351:Electric power generation, transmission and distribution / 3510:Electric power generation, transmission and distribution              | 0.92        | kg 1,4-DCB-Eq        |

|                                                                                                                                    |                                                                                                                                           |          |                      |
|------------------------------------------------------------------------------------------------------------------------------------|-------------------------------------------------------------------------------------------------------------------------------------------|----------|----------------------|
| market for nickel concentrate, 16% Ni   nickel concentrate, 16% Ni   Consequential, S - GLO                                        | 242:Manufacture of basic precious and other non-ferrous metals / 2420:Manufacture of basic precious and other non-ferrous metals          | 5.23     | kg 1,4-DCB-Eq        |
| nitric acid production, product in 50% solution state   nitric acid, without water, in 50% solution state   Consequential, S - RoW | 201:Manufacture of basic chemicals, fertilizers and nitrogen compounds, plastics / 2012:Manufacture of fertilizers and nitrogen compounds | 0.069941 | kg 1,4-DCB-Eq        |
| nitric oxide production   nitric oxide   Consequential, S - GLO                                                                    | 201:Manufacture of basic chemicals, fertilizers and nitrogen compounds, plastics / 2011:Manufacture of basic chemicals                    | 0.076527 | kg 1,4-DCB-Eq        |
| urea production   urea   Consequential, S - CN                                                                                     | 201:Manufacture of basic chemicals, fertilizers and nitrogen compounds, plastics / 2012:Manufacture of fertilizers and nitrogen compounds | 0.084165 | kg 1,4-DCB-Eq        |
| <b>ecotoxicity: marine - marine ecotoxicity potential (METP)</b>                                                                   |                                                                                                                                           | 8.41     | <b>kg 1,4-DCB-Eq</b> |
| ammonia production, steam reforming, liquid   ammonia, anhydrous, liquid   Consequential, S - UN-SEASIA                            | 201:Manufacture of basic chemicals, fertilizers and nitrogen compounds, plastics / 2012:Manufacture of fertilizers and nitrogen compounds | 0.24     | kg 1,4-DCB-Eq        |
| market for electricity, medium voltage   electricity, medium voltage   Consequential, S - IN-Northern grid                         | 351:Electric power generation, transmission and distribution / 3510:Electric power generation, transmission and distribution              | 1.24     | kg 1,4-DCB-Eq        |
| market for nickel concentrate, 16% Ni   nickel concentrate, 16% Ni   Consequential, S - GLO                                        | 242:Manufacture of basic precious and other non-ferrous metals / 2420:Manufacture of basic precious and other non-ferrous metals          | 6.59     | kg 1,4-DCB-Eq        |
| nitric acid production, product in 50% solution state   nitric acid, without water, in 50% solution state   Consequential, S - RoW | 201:Manufacture of basic chemicals, fertilizers and nitrogen compounds, plastics / 2012:Manufacture of fertilizers and nitrogen compounds | 0.097266 | kg 1,4-DCB-Eq        |
| nitric oxide production                                                                                                            | 201:Manufacture of basic chemicals, fertilizers                                                                                           | 0.11     | kg 1,4-              |

|                                                                                                                                                      |                                                                                                                                                    |        |                                |
|------------------------------------------------------------------------------------------------------------------------------------------------------|----------------------------------------------------------------------------------------------------------------------------------------------------|--------|--------------------------------|
| nitric oxide  <br>Consequential, S -<br>GLO                                                                                                          | and nitrogen compounds, plastics /<br>2011:Manufacture of basic chemicals                                                                          |        | DCB-<br>Eq                     |
| urea production   urea  <br>Consequential, S - CN                                                                                                    | 201:Manufacture of basic chemicals, fertilizers<br>and nitrogen compounds, plastics /<br>2012:Manufacture of fertilizers and nitrogen<br>compounds | 0.12   | kg 1,4-<br>DCB-<br>Eq          |
| <b>ecotoxicity: terrestrial - terrestrial ecotoxicity potential (TETP)</b>                                                                           |                                                                                                                                                    | 114.43 | <b>kg 1,4-<br/>DCB-<br/>Eq</b> |
| acetic acid production,<br>product in 98%<br>solution state   acetic<br>acid, without water, in<br>98% solution state  <br>Consequential, S -<br>RER | 201:Manufacture of basic chemicals, fertilizers<br>and nitrogen compounds, plastics /<br>2011:Manufacture of basic chemicals                       | 2.67   | kg 1,4-<br>DCB-<br>Eq          |
| ammonia production,<br>steam reforming,<br>liquid   ammonia,<br>anhydrous, liquid  <br>Consequential, S -<br>UN-SEASIA                               | 201:Manufacture of basic chemicals, fertilizers<br>and nitrogen compounds, plastics /<br>2012:Manufacture of fertilizers and nitrogen<br>compounds | 30.14  | kg 1,4-<br>DCB-<br>Eq          |
| market for electricity,<br>medium voltage  <br>electricity, medium<br>voltage  <br>Consequential, S - IN-<br>Northern grid                           | 351:Electric power generation, transmission<br>and distribution / 3510:Electric power<br>generation, transmission and distribution                 | 28.55  | kg 1,4-<br>DCB-<br>Eq          |
| market for nickel<br>concentrate, 16% Ni  <br>nickel concentrate,<br>16% Ni  <br>Consequential, S -<br>GLO                                           | 242:Manufacture of basic precious and other<br>non-ferrous metals / 2420:Manufacture of<br>basic precious and other non-ferrous metals             | 13.65  | kg 1,4-<br>DCB-<br>Eq          |
| nitric acid production,<br>product in 50%<br>solution state   nitric<br>acid, without water, in<br>50% solution state  <br>Consequential, S -<br>RoW | 201:Manufacture of basic chemicals, fertilizers<br>and nitrogen compounds, plastics /<br>2012:Manufacture of fertilizers and nitrogen<br>compounds | 12.15  | kg 1,4-<br>DCB-<br>Eq          |
| nitric oxide production<br>  nitric oxide  <br>Consequential, S -<br>GLO                                                                             | 201:Manufacture of basic chemicals, fertilizers<br>and nitrogen compounds, plastics /<br>2011:Manufacture of basic chemicals                       | 13.88  | kg 1,4-<br>DCB-<br>Eq          |
| urea production   urea  <br>Consequential, S - CN                                                                                                    | 201:Manufacture of basic chemicals, fertilizers<br>and nitrogen compounds, plastics /<br>2012:Manufacture of fertilizers and nitrogen<br>compounds | 13.15  | kg 1,4-<br>DCB-<br>Eq          |

|                                                                                                                                    |                                                                                                                                           |                |                  |
|------------------------------------------------------------------------------------------------------------------------------------|-------------------------------------------------------------------------------------------------------------------------------------------|----------------|------------------|
| <b>energy resources: non-renewable, fossil - fossil fuel potential (FFP)</b>                                                       |                                                                                                                                           | 17.09          | <b>kg oil-Eq</b> |
| acetic acid production, product in 98% solution state   acetic acid, without water, in 98% solution state   Consequential, S - RER | 201:Manufacture of basic chemicals, fertilizers and nitrogen compounds, plastics / 2011:Manufacture of basic chemicals                    | 0.35           | kg oil-Eq        |
| ammonia production, steam reforming, liquid   ammonia, anhydrous, liquid   Consequential, S - UN-SEASIA                            | 201:Manufacture of basic chemicals, fertilizers and nitrogen compounds, plastics / 2012:Manufacture of fertilizers and nitrogen compounds | 4.63           | kg oil-Eq        |
| market for electricity, medium voltage   electricity, medium voltage   Consequential, S - IN-Northern grid                         | 351:Electric power generation, transmission and distribution / 3510:Electric power generation, transmission and distribution              | 8.49           | kg oil-Eq        |
| market for nickel concentrate, 16% Ni   nickel concentrate, 16% Ni   Consequential, S - GLO                                        | 242:Manufacture of basic precious and other non-ferrous metals / 2420:Manufacture of basic precious and other non-ferrous metals          | 0.52           | kg oil-Eq        |
| nitric acid production, product in 50% solution state   nitric acid, without water, in 50% solution state   Consequential, S - RoW | 201:Manufacture of basic chemicals, fertilizers and nitrogen compounds, plastics / 2012:Manufacture of fertilizers and nitrogen compounds | 0.65           | kg oil-Eq        |
| nitric oxide production   nitric oxide   Consequential, S - GLO                                                                    | 201:Manufacture of basic chemicals, fertilizers and nitrogen compounds, plastics / 2011:Manufacture of basic chemicals                    | 1.42           | kg oil-Eq        |
| urea production   urea   Consequential, S - CN                                                                                     | 201:Manufacture of basic chemicals, fertilizers and nitrogen compounds, plastics / 2012:Manufacture of fertilizers and nitrogen compounds | 1              | kg oil-Eq        |
| <b>eutrophication: freshwater - freshwater eutrophication potential (FEP)</b>                                                      |                                                                                                                                           | <b>0.03480</b> | <b>kg P-Eq</b>   |
| ammonia production, steam reforming, liquid   ammonia, anhydrous, liquid   Consequential, S - UN-SEASIA                            | 201:Manufacture of basic chemicals, fertilizers and nitrogen compounds, plastics / 2012:Manufacture of fertilizers and nitrogen compounds | 0.000594       | kg P-Eq          |

|                                                                                                                                    |                                                                                                                                           |                 |                |
|------------------------------------------------------------------------------------------------------------------------------------|-------------------------------------------------------------------------------------------------------------------------------------------|-----------------|----------------|
| market for electricity, medium voltage   electricity, medium voltage   Consequential, S - IN-Northern grid                         | 351:Electric power generation, transmission and distribution / 3510:Electric power generation, transmission and distribution              | 0.02425         | kg P-Eq        |
| market for nickel concentrate, 16% Ni   nickel concentrate, 16% Ni   Consequential, S - GLO                                        | 242:Manufacture of basic precious and other non-ferrous metals / 2420:Manufacture of basic precious and other non-ferrous metals          | 0.006358        | kg P-Eq        |
| nitric acid production, product in 50% solution state   nitric acid, without water, in 50% solution state   Consequential, S - RoW | 201:Manufacture of basic chemicals, fertilizers and nitrogen compounds, plastics / 2012:Manufacture of fertilizers and nitrogen compounds | 0.001015        | kg P-Eq        |
| nitric oxide production   nitric oxide   Consequential, S - GLO                                                                    | 201:Manufacture of basic chemicals, fertilizers and nitrogen compounds, plastics / 2011:Manufacture of basic chemicals                    | 0.00124         | kg P-Eq        |
| urea production   urea   Consequential, S - CN                                                                                     | 201:Manufacture of basic chemicals, fertilizers and nitrogen compounds, plastics / 2012:Manufacture of fertilizers and nitrogen compounds | 0.001004        | kg P-Eq        |
| <b>eutrophication: marine - marine eutrophication potential (MEP)</b>                                                              |                                                                                                                                           | <b>0.002802</b> | <b>kg N-Eq</b> |
| ammonia production, steam reforming, liquid   ammonia, anhydrous, liquid   Consequential, S - UN-SEASIA                            | 201:Manufacture of basic chemicals, fertilizers and nitrogen compounds, plastics / 2012:Manufacture of fertilizers and nitrogen compounds | 0.000206        | kg N-Eq        |
| market for electricity, medium voltage   electricity, medium voltage   Consequential, S - IN-Northern grid                         | 351:Electric power generation, transmission and distribution / 3510:Electric power generation, transmission and distribution              | 0.001524        | kg N-Eq        |
| market for nickel concentrate, 16% Ni   nickel concentrate, 16% Ni   Consequential, S - GLO                                        | 242:Manufacture of basic precious and other non-ferrous metals / 2420:Manufacture of basic precious and other non-ferrous metals          | -1E-04          | kg N-Eq        |
| market for wastewater, average   wastewater, average                                                                               | 370:Sewerage / 3700:Sewerage                                                                                                              | 0.00056         | kg N-Eq        |

|                                                                                                                                       |                                                                                                                                              |              |                                |
|---------------------------------------------------------------------------------------------------------------------------------------|----------------------------------------------------------------------------------------------------------------------------------------------|--------------|--------------------------------|
| Consequential, S -<br>RoW                                                                                                             |                                                                                                                                              |              |                                |
| nitric acid production, product in 50% solution state   nitric acid, without water, in 50% solution state   Consequential, S -<br>RoW | 201:Manufacture of basic chemicals, fertilizers and nitrogen compounds, plastics /<br>2012:Manufacture of fertilizers and nitrogen compounds | 0.00017<br>4 | kg N-<br>Eq                    |
| nitric oxide production   nitric oxide   Consequential, S -<br>GLO                                                                    | 201:Manufacture of basic chemicals, fertilizers and nitrogen compounds, plastics /<br>2011:Manufacture of basic chemicals                    | 0.00011<br>1 | kg N-<br>Eq                    |
| urea production   urea   Consequential, S -<br>CN                                                                                     | 201:Manufacture of basic chemicals, fertilizers and nitrogen compounds, plastics /<br>2012:Manufacture of fertilizers and nitrogen compounds | 0.00030<br>6 | kg N-<br>Eq                    |
| <b>human toxicity: carcinogenic - human toxicity potential (HTPc)</b>                                                                 |                                                                                                                                              | <b>2.6</b>   | <b>kg 1,4-<br/>DCB-<br/>Eq</b> |
| ammonia production, steam reforming, liquid   ammonia, anhydrous, liquid   Consequential, S -<br>UN-SEASIA                            | 201:Manufacture of basic chemicals, fertilizers and nitrogen compounds, plastics /<br>2012:Manufacture of fertilizers and nitrogen compounds | 0.08639<br>3 | kg 1,4-<br>DCB-<br>Eq          |
| market for electricity, medium voltage   electricity, medium voltage   Consequential, S -<br>IN-Northern grid                         | 351:Electric power generation, transmission and distribution / 3510:Electric power generation, transmission and distribution                 | 1.64         | kg 1,4-<br>DCB-<br>Eq          |
| market for nickel concentrate, 16% Ni   nickel concentrate, 16% Ni   Consequential, S -<br>GLO                                        | 242:Manufacture of basic precious and other non-ferrous metals / 2420:Manufacture of basic precious and other non-ferrous metals             | 0.59         | kg 1,4-<br>DCB-<br>Eq          |
| nitric acid production, product in 50% solution state   nitric acid, without water, in 50% solution state   Consequential, S -<br>RoW | 201:Manufacture of basic chemicals, fertilizers and nitrogen compounds, plastics /<br>2012:Manufacture of fertilizers and nitrogen compounds | 0.07890<br>3 | kg 1,4-<br>DCB-<br>Eq          |
| nitric oxide production   nitric oxide   Consequential, S -                                                                           | 201:Manufacture of basic chemicals, fertilizers and nitrogen compounds, plastics /<br>2011:Manufacture of basic chemicals                    | 0.09502<br>8 | kg 1,4-<br>DCB-<br>Eq          |

|                                                                                                                                    |                                                                                                                                           |              |                      |
|------------------------------------------------------------------------------------------------------------------------------------|-------------------------------------------------------------------------------------------------------------------------------------------|--------------|----------------------|
| GLO                                                                                                                                |                                                                                                                                           |              |                      |
| urea production   urea   Consequential, S - CN                                                                                     | 201:Manufacture of basic chemicals, fertilizers and nitrogen compounds, plastics / 2012:Manufacture of fertilizers and nitrogen compounds | 0.098174     | kg 1,4-DCB-Eq        |
| <b>human toxicity: non-carcinogenic - human toxicity potential (HTPnc)</b>                                                         |                                                                                                                                           | <b>104.3</b> | <b>kg 1,4-DCB-Eq</b> |
| ammonia production, steam reforming, liquid   ammonia, anhydrous, liquid   Consequential, S - UN-SEASIA                            | 201:Manufacture of basic chemicals, fertilizers and nitrogen compounds, plastics / 2012:Manufacture of fertilizers and nitrogen compounds | 3.32         | kg 1,4-DCB-Eq        |
| market for electricity, medium voltage   electricity, medium voltage   Consequential, S - IN-Northern grid                         | 351:Electric power generation, transmission and distribution / 3510:Electric power generation, transmission and distribution              | 34.21        | kg 1,4-DCB-Eq        |
| market for nickel concentrate, 16% Ni   nickel concentrate, 16% Ni   Consequential, S - GLO                                        | 242:Manufacture of basic precious and other non-ferrous metals / 2420:Manufacture of basic precious and other non-ferrous metals          | 58.88        | kg 1,4-DCB-Eq        |
| nitric acid production, product in 50% solution state   nitric acid, without water, in 50% solution state   Consequential, S - RoW | 201:Manufacture of basic chemicals, fertilizers and nitrogen compounds, plastics / 2012:Manufacture of fertilizers and nitrogen compounds | 2.38         | kg 1,4-DCB-Eq        |
| nitric oxide production   nitric oxide   Consequential, S - GLO                                                                    | 201:Manufacture of basic chemicals, fertilizers and nitrogen compounds, plastics / 2011:Manufacture of basic chemicals                    | 2.71         | kg 1,4-DCB-Eq        |
| urea production   urea   Consequential, S - CN                                                                                     | 201:Manufacture of basic chemicals, fertilizers and nitrogen compounds, plastics / 2012:Manufacture of fertilizers and nitrogen compounds | 2.44         | kg 1,4-DCB-Eq        |
| <b>ionising radiation - ionising radiation potential (IRP)</b>                                                                     |                                                                                                                                           | <b>0.85</b>  | <b>kBq Co-60-Eq</b>  |
| acetic acid production, product in 98% solution state   acetic acid, without water, in 98% solution state                          | 201:Manufacture of basic chemicals, fertilizers and nitrogen compounds, plastics / 2011:Manufacture of basic chemicals                    | 0.059871     | kBq Co-60-Eq         |

|                                                                                                                                    |                                                                                                                                           |          |                     |
|------------------------------------------------------------------------------------------------------------------------------------|-------------------------------------------------------------------------------------------------------------------------------------------|----------|---------------------|
| Consequential, S - RER                                                                                                             |                                                                                                                                           |          |                     |
| ammonia production, steam reforming, liquid   ammonia, anhydrous, liquid   Consequential, S - UN-SEASIA                            | 201:Manufacture of basic chemicals, fertilizers and nitrogen compounds, plastics / 2012:Manufacture of fertilizers and nitrogen compounds | 0.02617  | kBq Co-60-Eq        |
| market for electricity, medium voltage   electricity, medium voltage   Consequential, S - IN-Northern grid                         | 351:Electric power generation, transmission and distribution / 3510:Electric power generation, transmission and distribution              | 1.11     | kBq Co-60-Eq        |
| market for nickel concentrate, 16% Ni   nickel concentrate, 16% Ni   Consequential, S - GLO                                        | 242:Manufacture of basic precious and other non-ferrous metals / 2420:Manufacture of basic precious and other non-ferrous metals          | -0.00905 | kBq Co-60-Eq        |
| nitric acid production, product in 50% solution state   nitric acid, without water, in 50% solution state   Consequential, S - RoW | 201:Manufacture of basic chemicals, fertilizers and nitrogen compounds, plastics / 2012:Manufacture of fertilizers and nitrogen compounds | -0.18    | kBq Co-60-Eq        |
| nitric oxide production   nitric oxide   Consequential, S - GLO                                                                    | 201:Manufacture of basic chemicals, fertilizers and nitrogen compounds, plastics / 2011:Manufacture of basic chemicals                    | -0.15    | kBq Co-60-Eq        |
| <b>land use - agricultural land occupation (LOP)</b>                                                                               |                                                                                                                                           | 1.3      | <b>m2*a crop-Eq</b> |
| acetic acid production, product in 98% solution state   acetic acid, without water, in 98% solution state   Consequential, S - RER | 201:Manufacture of basic chemicals, fertilizers and nitrogen compounds, plastics / 2011:Manufacture of basic chemicals                    | 0.037235 | m2*a crop-Eq        |
| ammonia production, steam reforming, liquid   ammonia, anhydrous, liquid   Consequential, S - UN-SEASIA                            | 201:Manufacture of basic chemicals, fertilizers and nitrogen compounds, plastics / 2012:Manufacture of fertilizers and nitrogen compounds | 0.058958 | m2*a crop-Eq        |
| market for electricity, medium voltage   electricity, medium                                                                       | 351:Electric power generation, transmission and distribution / 3510:Electric power generation, transmission and distribution              | 0.61     | m2*a crop-Eq        |



|                                                                                                                                                      |                                                                                                                                                    |                      |                              |
|------------------------------------------------------------------------------------------------------------------------------------------------------|----------------------------------------------------------------------------------------------------------------------------------------------------|----------------------|------------------------------|
| voltage  <br>Consequential, S - IN-<br>Northern grid                                                                                                 |                                                                                                                                                    |                      |                              |
| market for nickel<br>concentrate, 16% Ni  <br>nickel concentrate,<br>16% Ni  <br>Consequential, S -<br>GLO                                           | 242:Manufacture of basic precious and other<br>non-ferrous metals / 2420:Manufacture of<br>basic precious and other non-ferrous metals             | 0.24                 | m2*a<br>crop-<br>Eq          |
| nitric acid production,<br>product in 50%<br>solution state   nitric<br>acid, without water, in<br>50% solution state  <br>Consequential, S -<br>RoW | 201:Manufacture of basic chemicals, fertilizers<br>and nitrogen compounds, plastics /<br>2012:Manufacture of fertilizers and nitrogen<br>compounds | 0.18                 | m2*a<br>crop-<br>Eq          |
| nitric oxide production<br>  nitric oxide  <br>Consequential, S -<br>GLO                                                                             | 201:Manufacture of basic chemicals, fertilizers<br>and nitrogen compounds, plastics /<br>2011:Manufacture of basic chemicals                       | 0.13                 | m2*a<br>crop-<br>Eq          |
| urea production   urea  <br>Consequential, S - CN                                                                                                    | 201:Manufacture of basic chemicals, fertilizers<br>and nitrogen compounds, plastics /<br>2012:Manufacture of fertilizers and nitrogen<br>compounds | 0.02886<br>9         | m2*a<br>crop-<br>Eq          |
| <b>material resources: metals/minerals - surplus ore potential<br/>(SOP)</b>                                                                         |                                                                                                                                                    | 2.68                 | <b>kg Cu-<br/>Eq</b>         |
| iron pellet production  <br>iron pellet  <br>Consequential, S -<br>CA-QC                                                                             | 241:Manufacture of basic iron and steel /<br>2410:Manufacture of basic iron and steel                                                              | 0.02949<br>7         | kg Cu-<br>Eq                 |
| market for nickel<br>concentrate, 16% Ni  <br>nickel concentrate,<br>16% Ni  <br>Consequential, S -<br>GLO                                           | 242:Manufacture of basic precious and other<br>non-ferrous metals / 2420:Manufacture of<br>basic precious and other non-ferrous metals             | 2.6                  | kg Cu-<br>Eq                 |
| <b>ozone depletion - ozone depletion potential (ODPinfinite)</b>                                                                                     |                                                                                                                                                    | <b>0.00012<br/>5</b> | <b>kg<br/>CFC-<br/>11-Eq</b> |
| market for electricity,<br>medium voltage  <br>electricity, medium<br>voltage  <br>Consequential, S - IN-<br>Northern grid                           | 351:Electric power generation, transmission<br>and distribution / 3510:Electric power<br>generation, transmission and distribution                 | 7.63E-<br>06         | kg<br>CFC-<br>11-Eq          |
| market for nickel<br>concentrate, 16% Ni  <br>nickel concentrate,<br>16% Ni  <br>Consequential, S -                                                  | 242:Manufacture of basic precious and other<br>non-ferrous metals / 2420:Manufacture of<br>basic precious and other non-ferrous metals             | 3.46E-<br>06         | kg<br>CFC-<br>11-Eq          |

|                                                                                                                                    |                                                                                                                                           |          |                    |
|------------------------------------------------------------------------------------------------------------------------------------|-------------------------------------------------------------------------------------------------------------------------------------------|----------|--------------------|
| GLO                                                                                                                                |                                                                                                                                           |          |                    |
| nitric acid production, product in 50% solution state   nitric acid, without water, in 50% solution state   Consequential, S - RoW | 201:Manufacture of basic chemicals, fertilizers and nitrogen compounds, plastics / 2012:Manufacture of fertilizers and nitrogen compounds | 0.000112 | kg CFC-11-Eq       |
| <b>particulate matter formation - particulate matter formation potential (PMFP)</b>                                                |                                                                                                                                           | 0.11     | <b>kg PM2.5-Eq</b> |
| ammonia production, steam reforming, liquid   ammonia, anhydrous, liquid   Consequential, S - UN-SEASIA                            | 201:Manufacture of basic chemicals, fertilizers and nitrogen compounds, plastics / 2012:Manufacture of fertilizers and nitrogen compounds | 0.003249 | kg PM2.5-Eq        |
| market for electricity, medium voltage   electricity, medium voltage   Consequential, S - IN-Northern grid                         | 351:Electric power generation, transmission and distribution / 3510:Electric power generation, transmission and distribution              | 0.076062 | kg PM2.5-Eq        |
| market for nickel concentrate, 16% Ni   nickel concentrate, 16% Ni   Consequential, S - GLO                                        | 242:Manufacture of basic precious and other non-ferrous metals / 2420:Manufacture of basic precious and other non-ferrous metals          | 0.003754 | kg PM2.5-Eq        |
| nitric acid production, product in 50% solution state   nitric acid, without water, in 50% solution state   Consequential, S - RoW | 201:Manufacture of basic chemicals, fertilizers and nitrogen compounds, plastics / 2012:Manufacture of fertilizers and nitrogen compounds | 0.003461 | kg PM2.5-Eq        |
| nitric oxide production   nitric oxide   Consequential, S - GLO                                                                    | 201:Manufacture of basic chemicals, fertilizers and nitrogen compounds, plastics / 2011:Manufacture of basic chemicals                    | 0.017951 | kg PM2.5-Eq        |
| urea production   urea   Consequential, S - CN                                                                                     | 201:Manufacture of basic chemicals, fertilizers and nitrogen compounds, plastics / 2012:Manufacture of fertilizers and nitrogen compounds | 0.005686 | kg PM2.5-Eq        |
| <b>photochemical oxidant formation: human health - photochemical oxidant formation potential: humans (HOFP)</b>                    |                                                                                                                                           | 0.13     | <b>kg NOx-Eq</b>   |
| ammonia production, steam reforming, liquid   ammonia,                                                                             | 201:Manufacture of basic chemicals, fertilizers and nitrogen compounds, plastics / 2012:Manufacture of fertilizers and nitrogen           | 0.011655 | kg NOx-Eq          |

|                                                                                                                                                      |                                                                                                                                                    |              |                           |
|------------------------------------------------------------------------------------------------------------------------------------------------------|----------------------------------------------------------------------------------------------------------------------------------------------------|--------------|---------------------------|
| anhydrous, liquid  <br>Consequential, S -<br>UN-SEASIA                                                                                               | compounds                                                                                                                                          |              |                           |
| market for electricity,<br>medium voltage  <br>electricity, medium<br>voltage  <br>Consequential, S - IN-<br>Northern grid                           | 351:Electric power generation, transmission<br>and distribution / 3510:Electric power<br>generation, transmission and distribution                 | 0.06867<br>5 | kg<br>NOx-<br>Eq          |
| market for nickel<br>concentrate, 16% Ni  <br>nickel concentrate,<br>16% Ni  <br>Consequential, S -<br>GLO                                           | 242:Manufacture of basic precious and other<br>non-ferrous metals / 2420:Manufacture of<br>basic precious and other non-ferrous metals             | 0.01397<br>4 | kg<br>NOx-<br>Eq          |
| nitric acid production,<br>product in 50%<br>solution state   nitric<br>acid, without water, in<br>50% solution state  <br>Consequential, S -<br>RoW | 201:Manufacture of basic chemicals, fertilizers<br>and nitrogen compounds, plastics /<br>2012:Manufacture of fertilizers and nitrogen<br>compounds | 0.00391<br>5 | kg<br>NOx-<br>Eq          |
| nitric oxide production<br>  nitric oxide  <br>Consequential, S -<br>GLO                                                                             | 201:Manufacture of basic chemicals, fertilizers<br>and nitrogen compounds, plastics /<br>2011:Manufacture of basic chemicals                       | 0.01972<br>2 | kg<br>NOx-<br>Eq          |
| urea production   urea  <br>Consequential, S - CN                                                                                                    | 201:Manufacture of basic chemicals, fertilizers<br>and nitrogen compounds, plastics /<br>2012:Manufacture of fertilizers and nitrogen<br>compounds | 0.00733<br>2 | kg<br>NOx-<br>Eq          |
| <b>photochemical oxidant formation: terrestrial ecosystems -<br/>photochemical oxidant formation potential: ecosystems (EOFP)</b>                    |                                                                                                                                                    | 0.13         | <b>kg<br/>NOx-<br/>Eq</b> |
| acetic acid production,<br>product in 98%<br>solution state   acetic<br>acid, without water, in<br>98% solution state  <br>Consequential, S -<br>RER | 201:Manufacture of basic chemicals, fertilizers<br>and nitrogen compounds, plastics /<br>2011:Manufacture of basic chemicals                       | 0.00137<br>8 | kg<br>NOx-<br>Eq          |
| ammonia production,<br>steam reforming,<br>liquid   ammonia,<br>anhydrous, liquid  <br>Consequential, S -<br>UN-SEASIA                               | 201:Manufacture of basic chemicals, fertilizers<br>and nitrogen compounds, plastics /<br>2012:Manufacture of fertilizers and nitrogen<br>compounds | 0.01311<br>3 | kg<br>NOx-<br>Eq          |
| market for electricity,<br>medium voltage  <br>electricity, medium<br>voltage                                                                        | 351:Electric power generation, transmission<br>and distribution / 3510:Electric power<br>generation, transmission and distribution                 | 0.06957<br>6 | kg<br>NOx-<br>Eq          |

|                                                                                                                                    |                                                                                                                                           |              |                  |
|------------------------------------------------------------------------------------------------------------------------------------|-------------------------------------------------------------------------------------------------------------------------------------------|--------------|------------------|
| Consequential, S - IN-Northern grid                                                                                                |                                                                                                                                           |              |                  |
| market for nickel concentrate, 16% Ni   nickel concentrate, 16% Ni   Consequential, S - GLO                                        | 242:Manufacture of basic precious and other non-ferrous metals / 2420:Manufacture of basic precious and other non-ferrous metals          | 0.01438<br>4 | kg<br>NOx-<br>Eq |
| nitric acid production, product in 50% solution state   nitric acid, without water, in 50% solution state   Consequential, S - RoW | 201:Manufacture of basic chemicals, fertilizers and nitrogen compounds, plastics / 2012:Manufacture of fertilizers and nitrogen compounds | 0.00413<br>4 | kg<br>NOx-<br>Eq |
| nitric oxide production   nitric oxide   Consequential, S - GLO                                                                    | 201:Manufacture of basic chemicals, fertilizers and nitrogen compounds, plastics / 2011:Manufacture of basic chemicals                    | 0.02031<br>3 | kg<br>NOx-<br>Eq |
| urea production   urea   Consequential, S - CN                                                                                     | 201:Manufacture of basic chemicals, fertilizers and nitrogen compounds, plastics / 2012:Manufacture of fertilizers and nitrogen compounds | 0.00802      | kg<br>NOx-<br>Eq |
| <b>water use - water consumption potential (WCP)</b>                                                                               |                                                                                                                                           | <b>0.63</b>  | <b>m3</b>        |
| acetic acid production, product in 98% solution state   acetic acid, without water, in 98% solution state   Consequential, S - RER | 201:Manufacture of basic chemicals, fertilizers and nitrogen compounds, plastics / 2011:Manufacture of basic chemicals                    | 0.01971<br>1 | m3               |
| ammonia production, steam reforming, liquid   ammonia, anhydrous, liquid   Consequential, S - UN-SEASIA                            | 201:Manufacture of basic chemicals, fertilizers and nitrogen compounds, plastics / 2012:Manufacture of fertilizers and nitrogen compounds | 0.27         | m3               |
| market for electricity, medium voltage   electricity, medium voltage   Consequential, S - IN-Northern grid                         | 351:Electric power generation, transmission and distribution / 3510:Electric power generation, transmission and distribution              | 0.12         | m3               |
| nitric acid production, product in 50% solution state   nitric acid, without water, in 50% solution state   Consequential, S - RoW | 201:Manufacture of basic chemicals, fertilizers and nitrogen compounds, plastics / 2012:Manufacture of fertilizers and nitrogen compounds | 0.04283<br>5 | m3               |

|                                                                          |                                                                                                                                                    |              |    |
|--------------------------------------------------------------------------|----------------------------------------------------------------------------------------------------------------------------------------------------|--------------|----|
| nitric oxide production<br>  nitric oxide  <br>Consequential, S -<br>GLO | 201:Manufacture of basic chemicals, fertilizers<br>and nitrogen compounds, plastics /<br>2011:Manufacture of basic chemicals                       | 0.06306<br>3 | m3 |
| urea production   urea  <br>Consequential, S - CN                        | 201:Manufacture of basic chemicals, fertilizers<br>and nitrogen compounds, plastics /<br>2012:Manufacture of fertilizers and nitrogen<br>compounds | 0.11         | m3 |

22

23

24 **Table S3: Category wise impacts associated with the use of ultrasonicator for As(III)**  
 25 **removal by Ni-Fe LDH/Ch and 5 cycles of reuse (5REC)**

| Name                                                                                                                               | Category                                                                                                                                  | Inventor<br>y result | Unit | Impact<br>t<br>factor | Unit | Impact<br>result | Unit                         |
|------------------------------------------------------------------------------------------------------------------------------------|-------------------------------------------------------------------------------------------------------------------------------------------|----------------------|------|-----------------------|------|------------------|------------------------------|
| <b>land use - agricultural land occupation (LOP)</b>                                                                               |                                                                                                                                           |                      |      |                       |      | <b>1.30063</b>   | <b>m2*a<br/>crop-<br/>Eq</b> |
| market for electricity, medium voltage   electricity, medium voltage   Consequential, S - IN-Northern grid                         | 351:Electric power generation, transmission and distribution / 3510:Electric power generation, transmission and distribution              |                      |      |                       |      | 0.57684          | m2*a<br>crop-<br>Eq          |
| market for nickel concentrate, 16% Ni   nickel concentrate, 16% Ni   Consequential, S - GLO                                        | 242:Manufacture of basic precious and other non-ferrous metals / 2420:Manufacture of basic precious and other non-ferrous metals          |                      |      |                       |      | 0.23763          | m2*a<br>crop-<br>Eq          |
| nitric acid production, product in 50% solution state   nitric acid, without water, in 50% solution state   Consequential, S - RoW | 201:Manufacture of basic chemicals, fertilizers and nitrogen compounds, plastics / 2012:Manufacture of fertilizers and nitrogen compounds |                      |      |                       |      | 0.18077          | m2*a<br>crop-<br>Eq          |
| nitric oxide production   nitric oxide   Consequential, S - GLO                                                                    | 201:Manufacture of basic chemicals, fertilizers and nitrogen compounds, plastics / 2011:Manufacture of basic chemicals                    |                      |      |                       |      | 0.12562          | m2*a<br>crop-<br>Eq          |
| ammonia production, steam reforming, liquid   ammonia, anhydrous, liquid   Consequential, S - UN-SEASIA                            | 201:Manufacture of basic chemicals, fertilizers and nitrogen compounds, plastics / 2012:Manufacture of fertilizers and nitrogen compounds |                      |      |                       |      | 0.05866          | m2*a<br>crop-<br>Eq          |
| electricity production, medium voltage, petroleum refinery operation   electricity, medium voltage   Consequential, S - IN         | 192:Manufacture of refined petroleum products / 1920:Manufacture of refined petroleum products                                            |                      |      |                       |      | 0.03819          | m2*a<br>crop-<br>Eq          |
| acetic acid production, product in 98% solution state   acetic acid, without water, in 98% solution state   Consequential, S - RER | 201:Manufacture of basic chemicals, fertilizers and nitrogen compounds, plastics / 2011:Manufacture of basic chemicals                    |                      |      |                       |      | 0.03705          | m2*a<br>crop-<br>Eq          |
| urea production   urea   Consequential, S - CN                                                                                     | 201:Manufacture of basic chemicals, fertilizers and nitrogen compounds, plastics / 2012:Manufacture of fertilizers and nitrogen compounds |                      |      |                       |      | 0.02872          | m2*a<br>crop-<br>Eq          |
| <b>human toxicity: non-carcinogenic - human toxicity potential</b>                                                                 |                                                                                                                                           |                      |      |                       |      | <b>104.241</b>   | <b>kg 1,4-</b>               |

|                                                                                                                                    |                                                                                                                                           |                 |                      |
|------------------------------------------------------------------------------------------------------------------------------------|-------------------------------------------------------------------------------------------------------------------------------------------|-----------------|----------------------|
| <b>(HTPnc)</b>                                                                                                                     |                                                                                                                                           | <b>4</b>        | <b>DCB-Eq</b>        |
| market for nickel concentrate, 16% Ni   nickel concentrate, 16% Ni   Consequential, S - GLO                                        | 242:Manufacture of basic precious and other non-ferrous metals / 2420:Manufacture of basic precious and other non-ferrous metals          | 58.59155        | kg 1,4-DCB-Eq        |
| market for electricity, medium voltage   electricity, medium voltage   Consequential, S - IN-Northern grid                         | 351:Electric power generation, transmission and distribution / 3510:Electric power generation, transmission and distribution              | 32.30391        | kg 1,4-DCB-Eq        |
| ammonia production, steam reforming, liquid   ammonia, anhydrous, liquid   Consequential, S - UN-SEASIA                            | 201:Manufacture of basic chemicals, fertilizers and nitrogen compounds, plastics / 2012:Manufacture of fertilizers and nitrogen compounds | 3.30418         | kg 1,4-DCB-Eq        |
| nitric oxide production   nitric oxide   Consequential, S - GLO                                                                    | 201:Manufacture of basic chemicals, fertilizers and nitrogen compounds, plastics / 2011:Manufacture of basic chemicals                    | 2.69445         | kg 1,4-DCB-Eq        |
| urea production   urea   Consequential, S - CN                                                                                     | 201:Manufacture of basic chemicals, fertilizers and nitrogen compounds, plastics / 2012:Manufacture of fertilizers and nitrogen compounds | 2.42381         | kg 1,4-DCB-Eq        |
| nitric acid production, product in 50% solution state   nitric acid, without water, in 50% solution state   Consequential, S - RoW | 201:Manufacture of basic chemicals, fertilizers and nitrogen compounds, plastics / 2012:Manufacture of fertilizers and nitrogen compounds | 2.36542         | kg 1,4-DCB-Eq        |
| electricity production, medium voltage, petroleum refinery operation   electricity, medium voltage   Consequential, S - IN         | 192:Manufacture of refined petroleum products / 1920:Manufacture of refined petroleum products                                            | 2.18234         | kg 1,4-DCB-Eq        |
| <b>ecotoxicity: terrestrial - terrestrial ecotoxicity potential (TETP)</b>                                                         |                                                                                                                                           | <b>122.7595</b> | <b>kg 1,4-DCB-Eq</b> |
| ammonia production, steam reforming, liquid   ammonia, anhydrous, liquid   Consequential, S - UN-SEASIA                            | 201:Manufacture of basic chemicals, fertilizers and nitrogen compounds, plastics / 2012:Manufacture of fertilizers and nitrogen compounds | 29.99441        | kg 1,4-DCB-Eq        |
| market for electricity, medium voltage   electricity, medium voltage   Consequential, S - IN-Northern grid                         | 351:Electric power generation, transmission and distribution / 3510:Electric power generation, transmission and distribution              | 26.96242        | kg 1,4-DCB-Eq        |
| nitric oxide production                                                                                                            | 201:Manufacture of basic chemicals,                                                                                                       | 13.8134         | kg 1,4-              |

|                                                                                                                                                   |                                                                                                                                                    |                |                              |
|---------------------------------------------------------------------------------------------------------------------------------------------------|----------------------------------------------------------------------------------------------------------------------------------------------------|----------------|------------------------------|
| nitric oxide  <br>Consequential, S - GLO                                                                                                          | fertilizers and nitrogen compounds, plastics /<br>2011:Manufacture of basic chemicals                                                              | 3              | DCB-<br>Eq                   |
| market for nickel<br>concentrate, 16% Ni  <br>nickel concentrate, 16%<br>Ni   Consequential, S -<br>GLO                                           | 242:Manufacture of basic precious and other<br>non-ferrous metals / 2420:Manufacture of<br>basic precious and other non-ferrous metals             | 13.5798<br>9   | kg 1,4-<br>DCB-<br>Eq        |
| urea production   urea  <br>Consequential, S - CN                                                                                                 | 201:Manufacture of basic chemicals,<br>fertilizers and nitrogen compounds, plastics /<br>2012:Manufacture of fertilizers and nitrogen<br>compounds | 13.0810<br>1   | kg 1,4-<br>DCB-<br>Eq        |
| nitric acid production,<br>product in 50% solution<br>state   nitric acid,<br>without water, in 50%<br>solution state  <br>Consequential, S - RoW | 201:Manufacture of basic chemicals,<br>fertilizers and nitrogen compounds, plastics /<br>2012:Manufacture of fertilizers and nitrogen<br>compounds | 12.0942<br>8   | kg 1,4-<br>DCB-<br>Eq        |
| electricity production,<br>medium voltage,<br>petroleum refinery<br>operation   electricity,<br>medium voltage  <br>Consequential, S - IN         | 192:Manufacture of refined petroleum<br>products / 1920:Manufacture of refined<br>petroleum products                                               | 10.2978<br>1   | kg 1,4-<br>DCB-<br>Eq        |
| acetic acid production,<br>product in 98% solution<br>state   acetic acid,<br>without water, in 98%<br>solution state  <br>Consequential, S - RER | 201:Manufacture of basic chemicals,<br>fertilizers and nitrogen compounds, plastics /<br>2011:Manufacture of basic chemicals                       | 2.65333        | kg 1,4-<br>DCB-<br>Eq        |
| <b>material resources: metals/minerals - surplus ore potential (SOP)</b>                                                                          |                                                                                                                                                    | <b>2.7041</b>  | <b>kg Cu-<br/>Eq</b>         |
| market for nickel<br>concentrate, 16% Ni  <br>nickel concentrate, 16%<br>Ni   Consequential, S -<br>GLO                                           | 242:Manufacture of basic precious and other<br>non-ferrous metals / 2420:Manufacture of<br>basic precious and other non-ferrous metals             | 2.58259        | kg Cu-<br>Eq                 |
| electricity production,<br>medium voltage,<br>petroleum refinery<br>operation   electricity,<br>medium voltage  <br>Consequential, S - IN         | 192:Manufacture of refined petroleum<br>products / 1920:Manufacture of refined<br>petroleum products                                               | 0.03836        | kg Cu-<br>Eq                 |
| iron pellet production  <br>iron pellet  <br>Consequential, S - CA-<br>QC                                                                         | 241:Manufacture of basic iron and steel /<br>2410:Manufacture of basic iron and steel                                                              | 0.02935        | kg Cu-<br>Eq                 |
| <b>ionising radiation - ionising radiation potential (IRP)</b>                                                                                    |                                                                                                                                                    | <b>0.83296</b> | <b>kBq<br/>Co-60-<br/>Eq</b> |
| market for electricity,                                                                                                                           | 351:Electric power generation, transmission                                                                                                        | 1.04596        | kBq                          |



|                                                                                                                                    |                                                                                                                                           |                |                  |
|------------------------------------------------------------------------------------------------------------------------------------|-------------------------------------------------------------------------------------------------------------------------------------------|----------------|------------------|
| medium voltage   electricity, medium voltage   Consequential, S - IN-Northern grid                                                 | and distribution / 3510:Electric power generation, transmission and distribution                                                          |                | Co-60-Eq         |
| acetic acid production, product in 98% solution state   acetic acid, without water, in 98% solution state   Consequential, S - RER | 201:Manufacture of basic chemicals, fertilizers and nitrogen compounds, plastics / 2011:Manufacture of basic chemicals                    | 0.05957        | kBq Co-60-Eq     |
| electricity production, medium voltage, petroleum refinery operation   electricity, medium voltage   Consequential, S - IN         | 192:Manufacture of refined petroleum products / 1920:Manufacture of refined petroleum products                                            | 0.04795        | kBq Co-60-Eq     |
| ammonia production, steam reforming, liquid   ammonia, anhydrous, liquid   Consequential, S - UN-SEASIA                            | 201:Manufacture of basic chemicals, fertilizers and nitrogen compounds, plastics / 2012:Manufacture of fertilizers and nitrogen compounds | 0.02604        | kBq Co-60-Eq     |
| market for nickel concentrate, 16% Ni   nickel concentrate, 16% Ni   Consequential, S - GLO                                        | 242:Manufacture of basic precious and other non-ferrous metals / 2420:Manufacture of basic precious and other non-ferrous metals          | -0.009         | kBq Co-60-Eq     |
| nitric oxide production   nitric oxide   Consequential, S - GLO                                                                    | 201:Manufacture of basic chemicals, fertilizers and nitrogen compounds, plastics / 2011:Manufacture of basic chemicals                    | -0.15404       | kBq Co-60-Eq     |
| nitric acid production, product in 50% solution state   nitric acid, without water, in 50% solution state   Consequential, S - RoW | 201:Manufacture of basic chemicals, fertilizers and nitrogen compounds, plastics / 2012:Manufacture of fertilizers and nitrogen compounds | -0.17845       | kBq Co-60-Eq     |
| <b>photochemical oxidant formation: human health - photochemical oxidant formation potential: humans (HOFP)</b>                    |                                                                                                                                           | <b>0.14814</b> | <b>kg NOx-Eq</b> |
| market for electricity, medium voltage   electricity, medium voltage   Consequential, S - IN-Northern grid                         | 351:Electric power generation, transmission and distribution / 3510:Electric power generation, transmission and distribution              | 0.06485        | kg NOx-Eq        |
| electricity production, medium voltage, petroleum refinery operation   electricity, medium voltage   Consequential, S - IN         | 192:Manufacture of refined petroleum products / 1920:Manufacture of refined petroleum products                                            | 0.02552        | kg NOx-Eq        |
| nitric oxide production                                                                                                            | 201:Manufacture of basic chemicals,                                                                                                       | 0.01962        | kg               |

|                                                                                                                                                   |                                                                                                                                                    |                |                               |
|---------------------------------------------------------------------------------------------------------------------------------------------------|----------------------------------------------------------------------------------------------------------------------------------------------------|----------------|-------------------------------|
| nitric oxide  <br>Consequential, S - GLO                                                                                                          | fertilizers and nitrogen compounds, plastics /<br>2011:Manufacture of basic chemicals                                                              |                | NO <sub>x</sub> -<br>Eq       |
| market for nickel<br>concentrate, 16% Ni  <br>nickel concentrate, 16%<br>Ni   Consequential, S -<br>GLO                                           | 242:Manufacture of basic precious and other<br>non-ferrous metals / 2420:Manufacture of<br>basic precious and other non-ferrous metals             | 0.0139         | kg<br>NO <sub>x</sub> -<br>Eq |
| ammonia production,<br>steam reforming, liquid  <br>ammonia, anhydrous,<br>liquid   Consequential, S<br>- UN-SEASIA                               | 201:Manufacture of basic chemicals,<br>fertilizers and nitrogen compounds, plastics /<br>2012:Manufacture of fertilizers and nitrogen<br>compounds | 0.0116         | kg<br>NO <sub>x</sub> -<br>Eq |
| urea production   urea  <br>Consequential, S - CN                                                                                                 | 201:Manufacture of basic chemicals,<br>fertilizers and nitrogen compounds, plastics /<br>2012:Manufacture of fertilizers and nitrogen<br>compounds | 0.0073         | kg<br>NO <sub>x</sub> -<br>Eq |
| nitric acid production,<br>product in 50% solution<br>state   nitric acid,<br>without water, in 50%<br>solution state  <br>Consequential, S - RoW | 201:Manufacture of basic chemicals,<br>fertilizers and nitrogen compounds, plastics /<br>2012:Manufacture of fertilizers and nitrogen<br>compounds | 0.0039         | kg<br>NO <sub>x</sub> -<br>Eq |
| <b>water use - water consumption potential (WCP)</b>                                                                                              |                                                                                                                                                    | <b>0.63208</b> | <b>m3</b>                     |
| ammonia production,<br>steam reforming, liquid  <br>ammonia, anhydrous,<br>liquid   Consequential, S<br>- UN-SEASIA                               | 201:Manufacture of basic chemicals,<br>fertilizers and nitrogen compounds, plastics /<br>2012:Manufacture of fertilizers and nitrogen<br>compounds | 0.27031        | m3                            |
| urea production   urea  <br>Consequential, S - CN                                                                                                 | 201:Manufacture of basic chemicals,<br>fertilizers and nitrogen compounds, plastics /<br>2012:Manufacture of fertilizers and nitrogen<br>compounds | 0.11027        | m3                            |
| market for electricity,<br>medium voltage  <br>electricity, medium<br>voltage   Consequential,<br>S - IN-Northern grid                            | 351:Electric power generation, transmission<br>and distribution / 3510:Electric power<br>generation, transmission and distribution                 | 0.10898        | m3                            |
| nitric oxide production  <br>nitric oxide  <br>Consequential, S - GLO                                                                             | 201:Manufacture of basic chemicals,<br>fertilizers and nitrogen compounds, plastics /<br>2011:Manufacture of basic chemicals                       | 0.06275        | m3                            |
| nitric acid production,<br>product in 50% solution<br>state   nitric acid,<br>without water, in 50%<br>solution state  <br>Consequential, S - RoW | 201:Manufacture of basic chemicals,<br>fertilizers and nitrogen compounds, plastics /<br>2012:Manufacture of fertilizers and nitrogen<br>compounds | 0.04262        | m3                            |
| acetic acid production,<br>product in 98% solution<br>state   acetic acid,<br>without water, in 98%                                               | 201:Manufacture of basic chemicals,<br>fertilizers and nitrogen compounds, plastics /<br>2011:Manufacture of basic chemicals                       | 0.01961        | m3                            |

|                                                                                                                                                   |                                                                                                                                                    |                |                                |
|---------------------------------------------------------------------------------------------------------------------------------------------------|----------------------------------------------------------------------------------------------------------------------------------------------------|----------------|--------------------------------|
| solution state  <br>Consequential, S - RER                                                                                                        |                                                                                                                                                    |                |                                |
| electricity production,<br>medium voltage,<br>petroleum refinery<br>operation   electricity,<br>medium voltage  <br>Consequential, S - IN         | 192:Manufacture of refined petroleum<br>products / 1920:Manufacture of refined<br>petroleum products                                               | 0.01209        | m3                             |
| <b>ecotoxicity: freshwater - freshwater ecotoxicity potential (FETP)</b>                                                                          |                                                                                                                                                    | <b>6.60289</b> | <b>kg 1,4-<br/>DCB-<br/>Eq</b> |
| market for nickel<br>concentrate, 16% Ni  <br>nickel concentrate, 16%<br>Ni   Consequential, S -<br>GLO                                           | 242:Manufacture of basic precious and other<br>non-ferrous metals / 2420:Manufacture of<br>basic precious and other non-ferrous metals             | 5.20661        | kg 1,4-<br>DCB-<br>Eq          |
| market for electricity,<br>medium voltage  <br>electricity, medium<br>voltage   Consequential,<br>S - IN-Northern grid                            | 351:Electric power generation, transmission<br>and distribution / 3510:Electric power<br>generation, transmission and distribution                 | 0.86975        | kg 1,4-<br>DCB-<br>Eq          |
| ammonia production,<br>steam reforming, liquid  <br>ammonia, anhydrous,<br>liquid   Consequential, S<br>- UN-SEASIA                               | 201:Manufacture of basic chemicals,<br>fertilizers and nitrogen compounds, plastics /<br>2012:Manufacture of fertilizers and nitrogen<br>compounds | 0.17858        | kg 1,4-<br>DCB-<br>Eq          |
| electricity production,<br>medium voltage,<br>petroleum refinery<br>operation   electricity,<br>medium voltage  <br>Consequential, S - IN         | 192:Manufacture of refined petroleum<br>products / 1920:Manufacture of refined<br>petroleum products                                               | 0.10269        | kg 1,4-<br>DCB-<br>Eq          |
| urea production   urea  <br>Consequential, S - CN                                                                                                 | 201:Manufacture of basic chemicals,<br>fertilizers and nitrogen compounds, plastics /<br>2012:Manufacture of fertilizers and nitrogen<br>compounds | 0.08375        | kg 1,4-<br>DCB-<br>Eq          |
| nitric oxide production  <br>nitric oxide  <br>Consequential, S - GLO                                                                             | 201:Manufacture of basic chemicals,<br>fertilizers and nitrogen compounds, plastics /<br>2011:Manufacture of basic chemicals                       | 0.07615        | kg 1,4-<br>DCB-<br>Eq          |
| nitric acid production,<br>product in 50% solution<br>state   nitric acid,<br>without water, in 50%<br>solution state  <br>Consequential, S - RoW | 201:Manufacture of basic chemicals,<br>fertilizers and nitrogen compounds, plastics /<br>2012:Manufacture of fertilizers and nitrogen<br>compounds | 0.06959        | kg 1,4-<br>DCB-<br>Eq          |
| <b>human toxicity: carcinogenic - human toxicity potential (HTPc)</b>                                                                             |                                                                                                                                                    | <b>2.52989</b> | <b>kg 1,4-<br/>DCB-<br/>Eq</b> |
| market for electricity,<br>medium voltage                                                                                                         | 351:Electric power generation, transmission<br>and distribution / 3510:Electric power                                                              | 1.54444        | kg 1,4-<br>DCB-                |

|                                                                                                                                    |                                                                                                                                           |                |                  |
|------------------------------------------------------------------------------------------------------------------------------------|-------------------------------------------------------------------------------------------------------------------------------------------|----------------|------------------|
| electricity, medium voltage   Consequential, S - IN-Northern grid                                                                  | generation, transmission and distribution                                                                                                 |                | Eq               |
| market for nickel concentrate, 16% Ni   nickel concentrate, 16% Ni   Consequential, S - GLO                                        | 242:Manufacture of basic precious and other non-ferrous metals / 2420:Manufacture of basic precious and other non-ferrous metals          | 0.59064        | kg 1,4-DCB-Eq    |
| urea production   urea   Consequential, S - CN                                                                                     | 201:Manufacture of basic chemicals, fertilizers and nitrogen compounds, plastics / 2012:Manufacture of fertilizers and nitrogen compounds | 0.09769        | kg 1,4-DCB-Eq    |
| nitric oxide production   nitric oxide   Consequential, S - GLO                                                                    | 201:Manufacture of basic chemicals, fertilizers and nitrogen compounds, plastics / 2011:Manufacture of basic chemicals                    | 0.09455        | kg 1,4-DCB-Eq    |
| ammonia production, steam reforming, liquid   ammonia, anhydrous, liquid   Consequential, S - UN-SEASIA                            | 201:Manufacture of basic chemicals, fertilizers and nitrogen compounds, plastics / 2012:Manufacture of fertilizers and nitrogen compounds | 0.08596        | kg 1,4-DCB-Eq    |
| nitric acid production, product in 50% solution state   nitric acid, without water, in 50% solution state   Consequential, S - RoW | 201:Manufacture of basic chemicals, fertilizers and nitrogen compounds, plastics / 2012:Manufacture of fertilizers and nitrogen compounds | 0.07851        | kg 1,4-DCB-Eq    |
| <b>photochemical oxidant formation: terrestrial ecosystems - photochemical oxidant formation potential: ecosystems (EOFP)</b>      |                                                                                                                                           | <b>0.15692</b> | <b>kg NOx-Eq</b> |
| market for electricity, medium voltage   electricity, medium voltage   Consequential, S - IN-Northern grid                         | 351:Electric power generation, transmission and distribution / 3510:Electric power generation, transmission and distribution              | 0.0657         | kg NOx-Eq        |
| electricity production, medium voltage, petroleum refinery operation   electricity, medium voltage   Consequential, S - IN         | 192:Manufacture of refined petroleum products / 1920:Manufacture of refined petroleum products                                            | 0.02988        | kg NOx-Eq        |
| nitric oxide production   nitric oxide   Consequential, S - GLO                                                                    | 201:Manufacture of basic chemicals, fertilizers and nitrogen compounds, plastics / 2011:Manufacture of basic chemicals                    | 0.02021        | kg NOx-Eq        |
| market for nickel concentrate, 16% Ni   nickel concentrate, 16% Ni   Consequential, S - GLO                                        | 242:Manufacture of basic precious and other non-ferrous metals / 2420:Manufacture of basic precious and other non-ferrous metals          | 0.01431        | kg NOx-Eq        |
| ammonia production, steam reforming, liquid                                                                                        | 201:Manufacture of basic chemicals, fertilizers and nitrogen compounds, plastics /                                                        | 0.01305        | kg NOx-          |

|                                                                                                                                    |                                                                                                                                           |                |                |
|------------------------------------------------------------------------------------------------------------------------------------|-------------------------------------------------------------------------------------------------------------------------------------------|----------------|----------------|
| ammonia, anhydrous, liquid   Consequential, S - UN-SEASIA                                                                          | 2012:Manufacture of fertilizers and nitrogen compounds                                                                                    |                | Eq             |
| urea production   urea   Consequential, S - CN                                                                                     | 201:Manufacture of basic chemicals, fertilizers and nitrogen compounds, plastics / 2012:Manufacture of fertilizers and nitrogen compounds | 0.00798        | kg NOx-Eq      |
| nitric acid production, product in 50% solution state   nitric acid, without water, in 50% solution state   Consequential, S - RoW | 201:Manufacture of basic chemicals, fertilizers and nitrogen compounds, plastics / 2012:Manufacture of fertilizers and nitrogen compounds | 0.00411        | kg NOx-Eq      |
| <b>eutrophication: marine - marine eutrophication potential (MEP)</b>                                                              |                                                                                                                                           | <b>0.00331</b> | <b>kg N-Eq</b> |
| market for electricity, medium voltage   electricity, medium voltage   Consequential, S - IN-Northern grid                         | 351:Electric power generation, transmission and distribution / 3510:Electric power generation, transmission and distribution              | 0.00144        | kg N-Eq        |
| electricity production, medium voltage, petroleum refinery operation   electricity, medium voltage   Consequential, S - IN         | 192:Manufacture of refined petroleum products / 1920:Manufacture of refined petroleum products                                            | 0.00058        | kg N-Eq        |
| market for wastewater, average   wastewater, average   Consequential, S - RoW                                                      | 370:Sewerage / 3700:Sewerage                                                                                                              | 0.00056        | kg N-Eq        |
| urea production   urea   Consequential, S - CN                                                                                     | 201:Manufacture of basic chemicals, fertilizers and nitrogen compounds, plastics / 2012:Manufacture of fertilizers and nitrogen compounds | 0.0003         | kg N-Eq        |
| ammonia production, steam reforming, liquid   ammonia, anhydrous, liquid   Consequential, S - UN-SEASIA                            | 201:Manufacture of basic chemicals, fertilizers and nitrogen compounds, plastics / 2012:Manufacture of fertilizers and nitrogen compounds | 0.00021        | kg N-Eq        |
| nitric acid production, product in 50% solution state   nitric acid, without water, in 50% solution state   Consequential, S - RoW | 201:Manufacture of basic chemicals, fertilizers and nitrogen compounds, plastics / 2012:Manufacture of fertilizers and nitrogen compounds | 0.00017        | kg N-Eq        |
| nitric oxide production   nitric oxide   Consequential, S - GLO                                                                    | 201:Manufacture of basic chemicals, fertilizers and nitrogen compounds, plastics / 2011:Manufacture of basic chemicals                    | 0.00011        | kg N-Eq        |
| market for nickel concentrate, 16% Ni                                                                                              | 242:Manufacture of basic precious and other non-ferrous metals / 2420:Manufacture of                                                      | -9.94E-05      | kg N-Eq        |

|                                                                                                                                    |                                                                                                                                           |                 |                      |
|------------------------------------------------------------------------------------------------------------------------------------|-------------------------------------------------------------------------------------------------------------------------------------------|-----------------|----------------------|
| nickel concentrate, 16% Ni   Consequential, S - GLO                                                                                | basic precious and other non-ferrous metals                                                                                               |                 |                      |
| <b>energy resources: non-renewable, fossil - fossil fuel potential (FFP)</b>                                                       |                                                                                                                                           | <b>24.94345</b> | <b>kg oil-Eq</b>     |
| electricity production, medium voltage, petroleum refinery operation   electricity, medium voltage   Consequential, S - IN         | 192:Manufacture of refined petroleum products / 1920:Manufacture of refined petroleum products                                            | 8.36464         | kg oil-Eq            |
| market for electricity, medium voltage   electricity, medium voltage   Consequential, S - IN-Northern grid                         | 351:Electric power generation, transmission and distribution / 3510:Electric power generation, transmission and distribution              | 8.01788         | kg oil-Eq            |
| ammonia production, steam reforming, liquid   ammonia, anhydrous, liquid   Consequential, S - UN-SEASIA                            | 201:Manufacture of basic chemicals, fertilizers and nitrogen compounds, plastics / 2012:Manufacture of fertilizers and nitrogen compounds | 4.60596         | kg oil-Eq            |
| nitric oxide production   nitric oxide   Consequential, S - GLO                                                                    | 201:Manufacture of basic chemicals, fertilizers and nitrogen compounds, plastics / 2011:Manufacture of basic chemicals                    | 1.41485         | kg oil-Eq            |
| urea production   urea   Consequential, S - CN                                                                                     | 201:Manufacture of basic chemicals, fertilizers and nitrogen compounds, plastics / 2012:Manufacture of fertilizers and nitrogen compounds | 0.99599         | kg oil-Eq            |
| nitric acid production, product in 50% solution state   nitric acid, without water, in 50% solution state   Consequential, S - RoW | 201:Manufacture of basic chemicals, fertilizers and nitrogen compounds, plastics / 2012:Manufacture of fertilizers and nitrogen compounds | 0.64588         | kg oil-Eq            |
| market for nickel concentrate, 16% Ni   nickel concentrate, 16% Ni   Consequential, S - GLO                                        | 242:Manufacture of basic precious and other non-ferrous metals / 2420:Manufacture of basic precious and other non-ferrous metals          | 0.51446         | kg oil-Eq            |
| acetic acid production, product in 98% solution state   acetic acid, without water, in 98% solution state   Consequential, S - RER | 201:Manufacture of basic chemicals, fertilizers and nitrogen compounds, plastics / 2011:Manufacture of basic chemicals                    | 0.34944         | kg oil-Eq            |
| <b>ecotoxicity: marine - marine ecotoxicity potential (METP)</b>                                                                   |                                                                                                                                           | <b>8.45332</b>  | <b>kg 1,4-DCB-Eq</b> |
| market for nickel concentrate, 16% Ni                                                                                              | 242:Manufacture of basic precious and other non-ferrous metals / 2420:Manufacture of                                                      | 6.55241         | kg 1,4-DCB-          |

|                                                                                                                                    |                                                                                                                                           |                |                     |
|------------------------------------------------------------------------------------------------------------------------------------|-------------------------------------------------------------------------------------------------------------------------------------------|----------------|---------------------|
| nickel concentrate, 16% Ni   Consequential, S - GLO                                                                                | basic precious and other non-ferrous metals                                                                                               |                | Eq                  |
| market for electricity, medium voltage   electricity, medium voltage   Consequential, S - IN-Northern grid                         | 351:Electric power generation, transmission and distribution / 3510:Electric power generation, transmission and distribution              | 1.17017        | kg 1,4-DCB-Eq       |
| ammonia production, steam reforming, liquid   ammonia, anhydrous, liquid   Consequential, S - UN-SEASIA                            | 201:Manufacture of basic chemicals, fertilizers and nitrogen compounds, plastics / 2012:Manufacture of fertilizers and nitrogen compounds | 0.24169        | kg 1,4-DCB-Eq       |
| electricity production, medium voltage, petroleum refinery operation   electricity, medium voltage   Consequential, S - IN         | 192:Manufacture of refined petroleum products / 1920:Manufacture of refined petroleum products                                            | 0.14942        | kg 1,4-DCB-Eq       |
| urea production   urea   Consequential, S - CN                                                                                     | 201:Manufacture of basic chemicals, fertilizers and nitrogen compounds, plastics / 2012:Manufacture of fertilizers and nitrogen compounds | 0.11483        | kg 1,4-DCB-Eq       |
| nitric oxide production   nitric oxide   Consequential, S - GLO                                                                    | 201:Manufacture of basic chemicals, fertilizers and nitrogen compounds, plastics / 2011:Manufacture of basic chemicals                    | 0.10733        | kg 1,4-DCB-Eq       |
| nitric acid production, product in 50% solution state   nitric acid, without water, in 50% solution state   Consequential, S - RoW | 201:Manufacture of basic chemicals, fertilizers and nitrogen compounds, plastics / 2012:Manufacture of fertilizers and nitrogen compounds | 0.09678        | kg 1,4-DCB-Eq       |
| <b>ozone depletion - ozone depletion potential (ODPinfinite)</b>                                                                   |                                                                                                                                           | <b>0.00013</b> | <b>kg CFC-11-Eq</b> |
| nitric acid production, product in 50% solution state   nitric acid, without water, in 50% solution state   Consequential, S - RoW | 201:Manufacture of basic chemicals, fertilizers and nitrogen compounds, plastics / 2012:Manufacture of fertilizers and nitrogen compounds | 0.00011        | kg CFC-11-Eq        |
| market for electricity, medium voltage   electricity, medium voltage   Consequential, S - IN-Northern grid                         | 351:Electric power generation, transmission and distribution / 3510:Electric power generation, transmission and distribution              | 7.20E-06       | kg CFC-11-Eq        |
| market for nickel concentrate, 16% Ni   nickel concentrate, 16% Ni   Consequential, S -                                            | 242:Manufacture of basic precious and other non-ferrous metals / 2420:Manufacture of basic precious and other non-ferrous metals          | 3.44E-06       | kg CFC-11-Eq        |

|                                                                                                                                    |                                                                                                                                           |                |                    |
|------------------------------------------------------------------------------------------------------------------------------------|-------------------------------------------------------------------------------------------------------------------------------------------|----------------|--------------------|
| GLO                                                                                                                                |                                                                                                                                           |                |                    |
| electricity production, medium voltage, petroleum refinery operation   electricity, medium voltage   Consequential, S - IN         | 192:Manufacture of refined petroleum products / 1920:Manufacture of refined petroleum products                                            | 1.98E-06       | kg CFC-11-Eq       |
| <b>particulate matter formation - particulate matter formation potential (PMFP)</b>                                                |                                                                                                                                           | <b>0.11403</b> | <b>kg PM2.5-Eq</b> |
| market for electricity, medium voltage   electricity, medium voltage   Consequential, S - IN-Northern grid                         | 351:Electric power generation, transmission and distribution / 3510:Electric power generation, transmission and distribution              | 0.07183        | kg PM2.5-Eq        |
| nitric oxide production   nitric oxide   Consequential, S - GLO                                                                    | 201:Manufacture of basic chemicals, fertilizers and nitrogen compounds, plastics / 2011:Manufacture of basic chemicals                    | 0.01786        | kg PM2.5-Eq        |
| electricity production, medium voltage, petroleum refinery operation   electricity, medium voltage   Consequential, S - IN         | 192:Manufacture of refined petroleum products / 1920:Manufacture of refined petroleum products                                            | 0.00736        | kg PM2.5-Eq        |
| urea production   urea   Consequential, S - CN                                                                                     | 201:Manufacture of basic chemicals, fertilizers and nitrogen compounds, plastics / 2012:Manufacture of fertilizers and nitrogen compounds | 0.00566        | kg PM2.5-Eq        |
| market for nickel concentrate, 16% Ni   nickel concentrate, 16% Ni   Consequential, S - GLO                                        | 242:Manufacture of basic precious and other non-ferrous metals / 2420:Manufacture of basic precious and other non-ferrous metals          | 0.00374        | kg PM2.5-Eq        |
| nitric acid production, product in 50% solution state   nitric acid, without water, in 50% solution state   Consequential, S - RoW | 201:Manufacture of basic chemicals, fertilizers and nitrogen compounds, plastics / 2012:Manufacture of fertilizers and nitrogen compounds | 0.00344        | kg PM2.5-Eq        |
| ammonia production, steam reforming, liquid   ammonia, anhydrous, liquid   Consequential, S - UN-SEASIA                            | 201:Manufacture of basic chemicals, fertilizers and nitrogen compounds, plastics / 2012:Manufacture of fertilizers and nitrogen compounds | 0.00323        | kg PM2.5-Eq        |
| <b>acidification: terrestrial - terrestrial acidification potential (TAP)</b>                                                      |                                                                                                                                           | <b>0.2671</b>  | <b>kg SO2-Eq</b>   |
| nitric oxide production   nitric oxide   Consequential, S - GLO                                                                    | 201:Manufacture of basic chemicals, fertilizers and nitrogen compounds, plastics / 2011:Manufacture of basic chemicals                    | 0.11312        | kg SO2-Eq          |



|                                                                                                                                    |                                                                                                                                           |                |                |
|------------------------------------------------------------------------------------------------------------------------------------|-------------------------------------------------------------------------------------------------------------------------------------------|----------------|----------------|
| market for electricity, medium voltage   electricity, medium voltage   Consequential, S - IN-Northern grid                         | 351:Electric power generation, transmission and distribution / 3510:Electric power generation, transmission and distribution              | 0.09069        | kg SO2-Eq      |
| electricity production, medium voltage, petroleum refinery operation   electricity, medium voltage   Consequential, S - IN         | 192:Manufacture of refined petroleum products / 1920:Manufacture of refined petroleum products                                            | 0.02084        | kg SO2-Eq      |
| nitric acid production, product in 50% solution state   nitric acid, without water, in 50% solution state   Consequential, S - RoW | 201:Manufacture of basic chemicals, fertilizers and nitrogen compounds, plastics / 2012:Manufacture of fertilizers and nitrogen compounds | 0.01425        | kg SO2-Eq      |
| urea production   urea   Consequential, S - CN                                                                                     | 201:Manufacture of basic chemicals, fertilizers and nitrogen compounds, plastics / 2012:Manufacture of fertilizers and nitrogen compounds | 0.01267        | kg SO2-Eq      |
| market for nickel concentrate, 16% Ni   nickel concentrate, 16% Ni   Consequential, S - GLO                                        | 242:Manufacture of basic precious and other non-ferrous metals / 2420:Manufacture of basic precious and other non-ferrous metals          | 0.00741        | kg SO2-Eq      |
| ammonia production, steam reforming, liquid   ammonia, anhydrous, liquid   Consequential, S - UN-SEASIA                            | 201:Manufacture of basic chemicals, fertilizers and nitrogen compounds, plastics / 2012:Manufacture of fertilizers and nitrogen compounds | 0.00631        | kg SO2-Eq      |
| <b>eutrophication: freshwater - freshwater eutrophication potential (FEP)</b>                                                      |                                                                                                                                           | <b>0.03379</b> | <b>kg P-Eq</b> |
| market for electricity, medium voltage   electricity, medium voltage   Consequential, S - IN-Northern grid                         | 351:Electric power generation, transmission and distribution / 3510:Electric power generation, transmission and distribution              | 0.0229         | kg P-Eq        |
| market for nickel concentrate, 16% Ni   nickel concentrate, 16% Ni   Consequential, S - GLO                                        | 242:Manufacture of basic precious and other non-ferrous metals / 2420:Manufacture of basic precious and other non-ferrous metals          | 0.00633        | kg P-Eq        |
| nitric oxide production   nitric oxide   Consequential, S - GLO                                                                    | 201:Manufacture of basic chemicals, fertilizers and nitrogen compounds, plastics / 2011:Manufacture of basic chemicals                    | 0.00123        | kg P-Eq        |
| nitric acid production, product in 50% solution state   nitric acid, without water, in 50%                                         | 201:Manufacture of basic chemicals, fertilizers and nitrogen compounds, plastics / 2012:Manufacture of fertilizers and nitrogen compounds | 0.00101        | kg P-Eq        |

|                                                                                                                                    |                                                                                                                                           |              |                  |
|------------------------------------------------------------------------------------------------------------------------------------|-------------------------------------------------------------------------------------------------------------------------------------------|--------------|------------------|
| solution state  <br>Consequential, S - RoW                                                                                         |                                                                                                                                           |              |                  |
| urea production   urea  <br>Consequential, S - CN                                                                                  | 201:Manufacture of basic chemicals, fertilizers and nitrogen compounds, plastics / 2012:Manufacture of fertilizers and nitrogen compounds | 0.001        | kg P-Eq          |
| ammonia production, steam reforming, liquid   ammonia, anhydrous, liquid   Consequential, S - UN-SEASIA                            | 201:Manufacture of basic chemicals, fertilizers and nitrogen compounds, plastics / 2012:Manufacture of fertilizers and nitrogen compounds | 0.00059      | kg P-Eq          |
| electricity production, medium voltage, petroleum refinery operation   electricity, medium voltage   Consequential, S - IN         | 192:Manufacture of refined petroleum products / 1920:Manufacture of refined petroleum products                                            | 0.00038      | kg P-Eq          |
| <b>climate change - global warming potential (GWP100)</b>                                                                          |                                                                                                                                           | <b>90.29</b> | <b>kg CO2-Eq</b> |
| market for electricity, medium voltage   electricity, medium voltage   Consequential, S - IN-Northern grid                         | 351:Electric power generation, transmission and distribution / 3510:Electric power generation, transmission and distribution              | 30.04151     | kg CO2-Eq        |
| electricity production, medium voltage, petroleum refinery operation   electricity, medium voltage   Consequential, S - IN         | 192:Manufacture of refined petroleum products / 1920:Manufacture of refined petroleum products                                            | 29.63303     | kg CO2-Eq        |
| ammonia production, steam reforming, liquid   ammonia, anhydrous, liquid   Consequential, S - UN-SEASIA                            | 201:Manufacture of basic chemicals, fertilizers and nitrogen compounds, plastics / 2012:Manufacture of fertilizers and nitrogen compounds | 13.61079     | kg CO2-Eq        |
| nitric acid production, product in 50% solution state   nitric acid, without water, in 50% solution state   Consequential, S - RoW | 201:Manufacture of basic chemicals, fertilizers and nitrogen compounds, plastics / 2012:Manufacture of fertilizers and nitrogen compounds | 5.21108      | kg CO2-Eq        |
| nitric oxide production   nitric oxide   Consequential, S - GLO                                                                    | 201:Manufacture of basic chemicals, fertilizers and nitrogen compounds, plastics / 2011:Manufacture of basic chemicals                    | 4.9701       | kg CO2-Eq        |
| urea production   urea   Consequential, S - CN                                                                                     | 201:Manufacture of basic chemicals, fertilizers and nitrogen compounds, plastics / 2012:Manufacture of fertilizers and nitrogen compounds | 3.8191       | kg CO2-Eq        |
| market for nickel                                                                                                                  | 242:Manufacture of basic precious and other                                                                                               | 2.23579      | kg               |

|                                                                           |                                                                                      |  |        |
|---------------------------------------------------------------------------|--------------------------------------------------------------------------------------|--|--------|
| concentrate, 16% Ni   nickel concentrate, 16% Ni   Consequential, S - GLO | non-ferrous metals / 2420:Manufacture of basic precious and other non-ferrous metals |  | CO2-Eq |
|---------------------------------------------------------------------------|--------------------------------------------------------------------------------------|--|--------|

26

27 **Table S4: Category wise impacts associated with the use of ultrasonicator for As(III)**  
 28 **removal using renewable source of electricity**

| Name                                                                                                                               | Category                                                                                                                                  | Inventor y result | Unit | Impact factor | Impact result  | Unit                |
|------------------------------------------------------------------------------------------------------------------------------------|-------------------------------------------------------------------------------------------------------------------------------------------|-------------------|------|---------------|----------------|---------------------|
| <b>land use - agricultural land occupation (LOP)</b>                                                                               |                                                                                                                                           |                   |      |               | <b>0.56226</b> | <b>m2*a crop-Eq</b> |
| market for nickel concentrate, 16% Ni   nickel concentrate, 16% Ni   Consequential, S - GLO                                        | 242:Manufacture of basic precious and other non-ferrous metals / 2420:Manufacture of basic precious and other non-ferrous metals          |                   |      |               | 0.23882        | m2*a crop-Eq        |
| nitric acid production, product in 50% solution state   nitric acid, without water, in 50% solution state   Consequential, S - RoW | 201:Manufacture of basic chemicals, fertilizers and nitrogen compounds, plastics / 2012:Manufacture of fertilizers and nitrogen compounds |                   |      |               | 0.18167        | m2*a crop-Eq        |
| nitric oxide production   nitric oxide   Consequential, S - GLO                                                                    | 201:Manufacture of basic chemicals, fertilizers and nitrogen compounds, plastics / 2011:Manufacture of basic chemicals                    |                   |      |               | 0.12624        | m2*a crop-Eq        |
| ammonia production, steam reforming, liquid   ammonia, anhydrous, liquid   Consequential, S - UN-SEASIA                            | 201:Manufacture of basic chemicals, fertilizers and nitrogen compounds, plastics / 2012:Manufacture of fertilizers and nitrogen compounds |                   |      |               | 0.05896        | m2*a crop-Eq        |
| acetic acid production, product in 98% solution state   acetic acid, without water, in 98% solution state   Consequential, S - RER | 201:Manufacture of basic chemicals, fertilizers and nitrogen compounds, plastics / 2011:Manufacture of basic chemicals                    |                   |      |               | 0.03725        | m2*a crop-Eq        |
| urea production   urea   Consequential, S - CN                                                                                     | 201:Manufacture of basic chemicals, fertilizers and nitrogen compounds, plastics / 2012:Manufacture of fertilizers and nitrogen compounds |                   |      |               | 0.02887        | m2*a crop-Eq        |
| market for water, deionised   water, deionised   Consequential, S - RoW                                                            | 360:Water collection, treatment and supply / 3600:Water collection, treatment and supply                                                  |                   |      |               | 0.01226        | m2*a crop-Eq        |
| market for electricity, medium voltage, renewable energy                                                                           | 351:Electric power generation, transmission and distribution / 3510:Electric power generation, transmission and distribution              |                   |      |               | -0.12571       | m2*a crop-Eq        |

|                                                                                                                                                    |                                                                                                                                           |                 |                      |
|----------------------------------------------------------------------------------------------------------------------------------------------------|-------------------------------------------------------------------------------------------------------------------------------------------|-----------------|----------------------|
| products   electricity, medium voltage, renewable energy products   Consequential, S - CH                                                          |                                                                                                                                           |                 |                      |
| <b>human toxicity: non-carcinogenic - human toxicity potential (HTPnc)</b>                                                                         |                                                                                                                                           | <b>73.41173</b> | <b>kg 1,4-DCB-Eq</b> |
| market for nickel concentrate, 16% Ni   nickel concentrate, 16% Ni   Consequential, S - GLO                                                        | 242:Manufacture of basic precious and other non-ferrous metals / 2420:Manufacture of basic precious and other non-ferrous metals          | 58.88451        | kg 1,4-DCB-Eq        |
| market for electricity, medium voltage, renewable energy products   electricity, medium voltage, renewable energy products   Consequential, S - CH | 351:Electric power generation, transmission and distribution / 3510:Electric power generation, transmission and distribution              | 3.32096         | kg 1,4-DCB-Eq        |
| ammonia production, steam reforming, liquid   ammonia, anhydrous, liquid   Consequential, S - UN-SEASIA                                            | 201:Manufacture of basic chemicals, fertilizers and nitrogen compounds, plastics / 2012:Manufacture of fertilizers and nitrogen compounds | 3.3207          | kg 1,4-DCB-Eq        |
| nitric oxide production   nitric oxide   Consequential, S - GLO                                                                                    | 201:Manufacture of basic chemicals, fertilizers and nitrogen compounds, plastics / 2011:Manufacture of basic chemicals                    | 2.70792         | kg 1,4-DCB-Eq        |
| urea production   urea   Consequential, S - CN                                                                                                     | 201:Manufacture of basic chemicals, fertilizers and nitrogen compounds, plastics / 2012:Manufacture of fertilizers and nitrogen compounds | 2.43593         | kg 1,4-DCB-Eq        |
| nitric acid production, product in 50% solution state   nitric acid, without water, in 50% solution state   Consequential, S - RoW                 | 201:Manufacture of basic chemicals, fertilizers and nitrogen compounds, plastics / 2012:Manufacture of fertilizers and nitrogen compounds | 2.37725         | kg 1,4-DCB-Eq        |
| <b>ecotoxicity: terrestrial - terrestrial ecotoxicity potential (TETP)</b>                                                                         |                                                                                                                                           | <b>91.53543</b> | <b>kg 1,4-DCB-Eq</b> |
| ammonia production, steam reforming, liquid   ammonia, anhydrous, liquid   Consequential, S - UN-SEASIA                                            | 201:Manufacture of basic chemicals, fertilizers and nitrogen compounds, plastics / 2012:Manufacture of fertilizers and nitrogen compounds | 30.14438        | kg 1,4-DCB-Eq        |
| nitric oxide production   nitric oxide   Consequential, S - GLO                                                                                    | 201:Manufacture of basic chemicals, fertilizers and nitrogen compounds, plastics / 2011:Manufacture of basic chemicals                    | 13.8825         | kg 1,4-DCB-Eq        |

|                                                                                                                                                    |                                                                                                                                           |          |                     |
|----------------------------------------------------------------------------------------------------------------------------------------------------|-------------------------------------------------------------------------------------------------------------------------------------------|----------|---------------------|
| market for nickel concentrate, 16% Ni   nickel concentrate, 16% Ni   Consequential, S - GLO                                                        | 242:Manufacture of basic precious and other non-ferrous metals / 2420:Manufacture of basic precious and other non-ferrous metals          | 13.64779 | kg 1,4-DCB-Eq       |
| urea production   urea   Consequential, S - CN                                                                                                     | 201:Manufacture of basic chemicals, fertilizers and nitrogen compounds, plastics / 2012:Manufacture of fertilizers and nitrogen compounds | 13.14641 | kg 1,4-DCB-Eq       |
| nitric acid production, product in 50% solution state   nitric acid, without water, in 50% solution state   Consequential, S - RoW                 | 201:Manufacture of basic chemicals, fertilizers and nitrogen compounds, plastics / 2012:Manufacture of fertilizers and nitrogen compounds | 12.15475 | kg 1,4-DCB-Eq       |
| market for electricity, medium voltage, renewable energy products   electricity, medium voltage, renewable energy products   Consequential, S - CH | 351:Electric power generation, transmission and distribution / 3510:Electric power generation, transmission and distribution              | 5.66018  | kg 1,4-DCB-Eq       |
| acetic acid production, product in 98% solution state   acetic acid, without water, in 98% solution state   Consequential, S - RER                 | 201:Manufacture of basic chemicals, fertilizers and nitrogen compounds, plastics / 2011:Manufacture of basic chemicals                    | 2.66776  | kg 1,4-DCB-Eq       |
| <b>material resources: metals/minerals - surplus ore potential (SOP)</b>                                                                           |                                                                                                                                           | 2.67311  | <b>kg Cu-Eq</b>     |
| market for nickel concentrate, 16% Ni   nickel concentrate, 16% Ni   Consequential, S - GLO                                                        | 242:Manufacture of basic precious and other non-ferrous metals / 2420:Manufacture of basic precious and other non-ferrous metals          | 2.5955   | kg Cu-Eq            |
| iron pellet production   iron pellet   Consequential, S - CA-QC                                                                                    | 241:Manufacture of basic iron and steel / 2410:Manufacture of basic iron and steel                                                        | 0.0295   | kg Cu-Eq            |
| <b>ionising radiation - ionising radiation potential (IRP)</b>                                                                                     |                                                                                                                                           | -0.27453 | <b>kBq Co-60-Eq</b> |
| acetic acid production, product in 98% solution state   acetic acid, without water, in 98% solution state   Consequential, S - RER                 | 201:Manufacture of basic chemicals, fertilizers and nitrogen compounds, plastics / 2011:Manufacture of basic chemicals                    | 0.0599   | kBq Co-60-Eq        |
| ammonia production,                                                                                                                                | 201:Manufacture of basic chemicals,                                                                                                       | 0.02617  | kBq                 |

|                                                                                                                                                    |                                                                                                                                           |          |                  |
|----------------------------------------------------------------------------------------------------------------------------------------------------|-------------------------------------------------------------------------------------------------------------------------------------------|----------|------------------|
| steam reforming, liquid   ammonia, anhydrous, liquid   Consequential, S - UN-SEASIA                                                                | fertilizers and nitrogen compounds, plastics / 2012:Manufacture of fertilizers and nitrogen compounds                                     |          | Co-60-Eq         |
| urea production   urea   Consequential, S - CN                                                                                                     | 201:Manufacture of basic chemicals, fertilizers and nitrogen compounds, plastics / 2012:Manufacture of fertilizers and nitrogen compounds | -0.00562 | kBq Co-60-Eq     |
| market for nickel concentrate, 16% Ni   nickel concentrate, 16% Ni   Consequential, S - GLO                                                        | 242:Manufacture of basic precious and other non-ferrous metals / 2420:Manufacture of basic precious and other non-ferrous metals          | -0.00905 | kBq Co-60-Eq     |
| market for electricity, medium voltage, renewable energy products   electricity, medium voltage, renewable energy products   Consequential, S - CH | 351:Electric power generation, transmission and distribution / 3510:Electric power generation, transmission and distribution              | -0.01259 | kBq Co-60-Eq     |
| nitric oxide production   nitric oxide   Consequential, S - GLO                                                                                    | 201:Manufacture of basic chemicals, fertilizers and nitrogen compounds, plastics / 2011:Manufacture of basic chemicals                    | -0.15481 | kBq Co-60-Eq     |
| nitric acid production, product in 50% solution state   nitric acid, without water, in 50% solution state   Consequential, S - RoW                 | 201:Manufacture of basic chemicals, fertilizers and nitrogen compounds, plastics / 2012:Manufacture of fertilizers and nitrogen compounds | -0.17935 | kBq Co-60-Eq     |
| <b>photochemical oxidant formation: human health - photochemical oxidant formation potential: humans (HOFP)</b>                                    |                                                                                                                                           | 0.05937  | <b>kg NOx-Eq</b> |
| nitric oxide production   nitric oxide   Consequential, S - GLO                                                                                    | 201:Manufacture of basic chemicals, fertilizers and nitrogen compounds, plastics / 2011:Manufacture of basic chemicals                    | 0.01972  | kg NOx-Eq        |
| market for nickel concentrate, 16% Ni   nickel concentrate, 16% Ni   Consequential, S - GLO                                                        | 242:Manufacture of basic precious and other non-ferrous metals / 2420:Manufacture of basic precious and other non-ferrous metals          | 0.01397  | kg NOx-Eq        |
| ammonia production, steam reforming, liquid   ammonia, anhydrous, liquid   Consequential, S - UN-SEASIA                                            | 201:Manufacture of basic chemicals, fertilizers and nitrogen compounds, plastics / 2012:Manufacture of fertilizers and nitrogen compounds | 0.01166  | kg NOx-Eq        |
| urea production   urea   Consequential, S - CN                                                                                                     | 201:Manufacture of basic chemicals, fertilizers and nitrogen compounds, plastics / 2012:Manufacture of fertilizers and nitrogen compounds | 0.00733  | kg NOx-Eq        |

|                                                                                                                                                    |                                                                                                                                           |         |           |
|----------------------------------------------------------------------------------------------------------------------------------------------------|-------------------------------------------------------------------------------------------------------------------------------------------|---------|-----------|
| nitric acid production, product in 50% solution state   nitric acid, without water, in 50% solution state   Consequential, S - RoW                 | 201:Manufacture of basic chemicals, fertilizers and nitrogen compounds, plastics / 2012:Manufacture of fertilizers and nitrogen compounds | 0.00391 | kg NOx-Eq |
| market for electricity, medium voltage, renewable energy products   electricity, medium voltage, renewable energy products   Consequential, S - CH | 351:Electric power generation, transmission and distribution / 3510:Electric power generation, transmission and distribution              | 0.00132 | kg NOx-Eq |
| acetic acid production, product in 98% solution state   acetic acid, without water, in 98% solution state   Consequential, S - RER                 | 201:Manufacture of basic chemicals, fertilizers and nitrogen compounds, plastics / 2011:Manufacture of basic chemicals                    | 0.00118 | kg NOx-Eq |
| <b>water use - water consumption potential (WCP)</b>                                                                                               |                                                                                                                                           | 0.90102 | <b>m3</b> |
| market for electricity, medium voltage, renewable energy products   electricity, medium voltage, renewable energy products   Consequential, S - CH | 351:Electric power generation, transmission and distribution / 3510:Electric power generation, transmission and distribution              | 0.3877  | m3        |
| ammonia production, steam reforming, liquid   ammonia, anhydrous, liquid   Consequential, S - UN-SEASIA                                            | 201:Manufacture of basic chemicals, fertilizers and nitrogen compounds, plastics / 2012:Manufacture of fertilizers and nitrogen compounds | 0.27166 | m3        |
| urea production   urea   Consequential, S - CN                                                                                                     | 201:Manufacture of basic chemicals, fertilizers and nitrogen compounds, plastics / 2012:Manufacture of fertilizers and nitrogen compounds | 0.11082 | m3        |
| nitric oxide production   nitric oxide   Consequential, S - GLO                                                                                    | 201:Manufacture of basic chemicals, fertilizers and nitrogen compounds, plastics / 2011:Manufacture of basic chemicals                    | 0.06306 | m3        |
| nitric acid production, product in 50% solution state   nitric acid, without water, in 50% solution state   Consequential, S - RoW                 | 201:Manufacture of basic chemicals, fertilizers and nitrogen compounds, plastics / 2012:Manufacture of fertilizers and nitrogen compounds | 0.04284 | m3        |
| acetic acid production, product in 98% solution state   acetic acid,                                                                               | 201:Manufacture of basic chemicals, fertilizers and nitrogen compounds, plastics / 2011:Manufacture of basic chemicals                    | 0.01972 | m3        |

|                                                                                                                                                    |                                                                                                                                           |                |                      |
|----------------------------------------------------------------------------------------------------------------------------------------------------|-------------------------------------------------------------------------------------------------------------------------------------------|----------------|----------------------|
| without water, in 98% solution state   Consequential, S - RER                                                                                      |                                                                                                                                           |                |                      |
| <b>ecotoxicity: freshwater - freshwater ecotoxicity potential (FETP)</b>                                                                           |                                                                                                                                           | 5.8888         | <b>kg 1,4-DCB-Eq</b> |
| market for nickel concentrate, 16% Ni   nickel concentrate, 16% Ni   Consequential, S - GLO                                                        | 242:Manufacture of basic precious and other non-ferrous metals / 2420:Manufacture of basic precious and other non-ferrous metals          | 5.23265        | kg 1,4-DCB-Eq        |
| market for electricity, medium voltage, renewable energy products   electricity, medium voltage, renewable energy products   Consequential, S - CH | 351:Electric power generation, transmission and distribution / 3510:Electric power generation, transmission and distribution              | 0.23014        | kg 1,4-DCB-Eq        |
| ammonia production, steam reforming, liquid   ammonia, anhydrous, liquid   Consequential, S - UN-SEASIA                                            | 201:Manufacture of basic chemicals, fertilizers and nitrogen compounds, plastics / 2012:Manufacture of fertilizers and nitrogen compounds | 0.17947        | kg 1,4-DCB-Eq        |
| urea production   urea   Consequential, S - CN                                                                                                     | 201:Manufacture of basic chemicals, fertilizers and nitrogen compounds, plastics / 2012:Manufacture of fertilizers and nitrogen compounds | 0.08416        | kg 1,4-DCB-Eq        |
| nitric oxide production   nitric oxide   Consequential, S - GLO                                                                                    | 201:Manufacture of basic chemicals, fertilizers and nitrogen compounds, plastics / 2011:Manufacture of basic chemicals                    | 0.07653        | kg 1,4-DCB-Eq        |
| nitric acid production, product in 50% solution state   nitric acid, without water, in 50% solution state   Consequential, S - RoW                 | 201:Manufacture of basic chemicals, fertilizers and nitrogen compounds, plastics / 2012:Manufacture of fertilizers and nitrogen compounds | 0.06994        | kg 1,4-DCB-Eq        |
| <b>human toxicity: carcinogenic - human toxicity potential (HTPc)</b>                                                                              |                                                                                                                                           | <b>1.08644</b> | <b>kg 1,4-DCB-Eq</b> |
| market for nickel concentrate, 16% Ni   nickel concentrate, 16% Ni   Consequential, S - GLO                                                        | 242:Manufacture of basic precious and other non-ferrous metals / 2420:Manufacture of basic precious and other non-ferrous metals          | 0.59359        | kg 1,4-DCB-Eq        |
| market for electricity, medium voltage, renewable energy products   electricity, medium voltage,                                                   | 351:Electric power generation, transmission and distribution / 3510:Electric power generation, transmission and distribution              | 0.11853        | kg 1,4-DCB-Eq        |



|                                                                                                                                    |                                                                                                                                           |         |                  |
|------------------------------------------------------------------------------------------------------------------------------------|-------------------------------------------------------------------------------------------------------------------------------------------|---------|------------------|
| renewable energy products   Consequential, S - CH                                                                                  |                                                                                                                                           |         |                  |
| urea production   urea   Consequential, S - CN                                                                                     | 201:Manufacture of basic chemicals, fertilizers and nitrogen compounds, plastics / 2012:Manufacture of fertilizers and nitrogen compounds | 0.09817 | kg 1,4-DCB-Eq    |
| nitric oxide production   nitric oxide   Consequential, S - GLO                                                                    | 201:Manufacture of basic chemicals, fertilizers and nitrogen compounds, plastics / 2011:Manufacture of basic chemicals                    | 0.09503 | kg 1,4-DCB-Eq    |
| ammonia production, steam reforming, liquid   ammonia, anhydrous, liquid   Consequential, S - UN-SEASIA                            | 201:Manufacture of basic chemicals, fertilizers and nitrogen compounds, plastics / 2012:Manufacture of fertilizers and nitrogen compounds | 0.08639 | kg 1,4-DCB-Eq    |
| nitric acid production, product in 50% solution state   nitric acid, without water, in 50% solution state   Consequential, S - RoW | 201:Manufacture of basic chemicals, fertilizers and nitrogen compounds, plastics / 2012:Manufacture of fertilizers and nitrogen compounds | 0.0789  | kg 1,4-DCB-Eq    |
| acetic acid production, product in 98% solution state   acetic acid, without water, in 98% solution state   Consequential, S - RER | 201:Manufacture of basic chemicals, fertilizers and nitrogen compounds, plastics / 2011:Manufacture of basic chemicals                    | 0.0163  | kg 1,4-DCB-Eq    |
| <b>photochemical oxidant formation: terrestrial ecosystems - photochemical oxidant formation potential: ecosystems (EOFP)</b>      |                                                                                                                                           | 0.06303 | <b>kg NOx-Eq</b> |
| nitric oxide production   nitric oxide   Consequential, S - GLO                                                                    | 201:Manufacture of basic chemicals, fertilizers and nitrogen compounds, plastics / 2011:Manufacture of basic chemicals                    | 0.02031 | kg NOx-Eq        |
| market for nickel concentrate, 16% Ni   nickel concentrate, 16% Ni   Consequential, S - GLO                                        | 242:Manufacture of basic precious and other non-ferrous metals / 2420:Manufacture of basic precious and other non-ferrous metals          | 0.01438 | kg NOx-Eq        |
| ammonia production, steam reforming, liquid   ammonia, anhydrous, liquid   Consequential, S - UN-SEASIA                            | 201:Manufacture of basic chemicals, fertilizers and nitrogen compounds, plastics / 2012:Manufacture of fertilizers and nitrogen compounds | 0.01311 | kg NOx-Eq        |
| urea production   urea   Consequential, S - CN                                                                                     | 201:Manufacture of basic chemicals, fertilizers and nitrogen compounds, plastics / 2012:Manufacture of fertilizers and nitrogen compounds | 0.00802 | kg NOx-Eq        |
| nitric acid production, product in 50% solution state   nitric acid, without                                                       | 201:Manufacture of basic chemicals, fertilizers and nitrogen compounds, plastics / 2012:Manufacture of fertilizers and                    | 0.00413 | kg NOx-Eq        |

|                                                                                                                                                    |                                                                                                                                           |                |                |
|----------------------------------------------------------------------------------------------------------------------------------------------------|-------------------------------------------------------------------------------------------------------------------------------------------|----------------|----------------|
| water, in 50% solution state   Consequential, S - RoW                                                                                              | nitrogen compounds                                                                                                                        |                |                |
| market for electricity, medium voltage, renewable energy products   electricity, medium voltage, renewable energy products   Consequential, S - CH | 351:Electric power generation, transmission and distribution / 3510:Electric power generation, transmission and distribution              | 0.00139        | kg NOx-Eq      |
| acetic acid production, product in 98% solution state   acetic acid, without water, in 98% solution state   Consequential, S - RER                 | 201:Manufacture of basic chemicals, fertilizers and nitrogen compounds, plastics / 2011:Manufacture of basic chemicals                    | 0.00138        | kg NOx-Eq      |
| <b>eutrophication: marine - marine eutrophication potential (MEP)</b>                                                                              |                                                                                                                                           | <b>0.00134</b> | <b>kg N-Eq</b> |
| market for wastewater, average   wastewater, average   Consequential, S - RoW                                                                      | 370:Sewerage / 3700:Sewerage                                                                                                              | 0.00056        | kg N-Eq        |
| urea production   urea   Consequential, S - CN                                                                                                     | 201:Manufacture of basic chemicals, fertilizers and nitrogen compounds, plastics / 2012:Manufacture of fertilizers and nitrogen compounds | 0.00031        | kg N-Eq        |
| ammonia production, steam reforming, liquid   ammonia, anhydrous, liquid   Consequential, S - UN-SEASIA                                            | 201:Manufacture of basic chemicals, fertilizers and nitrogen compounds, plastics / 2012:Manufacture of fertilizers and nitrogen compounds | 0.00021        | kg N-Eq        |
| nitric acid production, product in 50% solution state   nitric acid, without water, in 50% solution state   Consequential, S - RoW                 | 201:Manufacture of basic chemicals, fertilizers and nitrogen compounds, plastics / 2012:Manufacture of fertilizers and nitrogen compounds | 0.00017        | kg N-Eq        |
| nitric oxide production   nitric oxide   Consequential, S - GLO                                                                                    | 201:Manufacture of basic chemicals, fertilizers and nitrogen compounds, plastics / 2011:Manufacture of basic chemicals                    | 0.00011        | kg N-Eq        |
| market for electricity, medium voltage, renewable energy products   electricity, medium voltage, renewable energy products   Consequential, S - CH | 351:Electric power generation, transmission and distribution / 3510:Electric power generation, transmission and distribution              | 6.13E-05       | kg N-Eq        |
| acetic acid production,                                                                                                                            | 201:Manufacture of basic chemicals,                                                                                                       | 2.07E-         | kg N-          |

|                                                                                                                                    |                                                                                                                                           |         |                      |
|------------------------------------------------------------------------------------------------------------------------------------|-------------------------------------------------------------------------------------------------------------------------------------------|---------|----------------------|
| product in 98% solution state   acetic acid, without water, in 98% solution state   Consequential, S - RER                         | fertilizers and nitrogen compounds, plastics / 2011:Manufacture of basic chemicals                                                        | 05      | Eq                   |
| market for nickel concentrate, 16% Ni   nickel concentrate, 16% Ni   Consequential, S - GLO                                        | 242:Manufacture of basic precious and other non-ferrous metals / 2420:Manufacture of basic precious and other non-ferrous metals          | -1E-04  | kg N-Eq              |
| <b>energy resources: non-renewable, fossil - fossil fuel potential (FFP)</b>                                                       |                                                                                                                                           | 8.65408 | <b>kg oil-Eq</b>     |
| ammonia production, steam reforming, liquid   ammonia, anhydrous, liquid   Consequential, S - UN-SEASIA                            | 201:Manufacture of basic chemicals, fertilizers and nitrogen compounds, plastics / 2012:Manufacture of fertilizers and nitrogen compounds | 4.62899 | kg oil-Eq            |
| nitric oxide production   nitric oxide   Consequential, S - GLO                                                                    | 201:Manufacture of basic chemicals, fertilizers and nitrogen compounds, plastics / 2011:Manufacture of basic chemicals                    | 1.42192 | kg oil-Eq            |
| urea production   urea   Consequential, S - CN                                                                                     | 201:Manufacture of basic chemicals, fertilizers and nitrogen compounds, plastics / 2012:Manufacture of fertilizers and nitrogen compounds | 1.00097 | kg oil-Eq            |
| nitric acid production, product in 50% solution state   nitric acid, without water, in 50% solution state   Consequential, S - RoW | 201:Manufacture of basic chemicals, fertilizers and nitrogen compounds, plastics / 2012:Manufacture of fertilizers and nitrogen compounds | 0.64911 | kg oil-Eq            |
| market for nickel concentrate, 16% Ni   nickel concentrate, 16% Ni   Consequential, S - GLO                                        | 242:Manufacture of basic precious and other non-ferrous metals / 2420:Manufacture of basic precious and other non-ferrous metals          | 0.51703 | kg oil-Eq            |
| acetic acid production, product in 98% solution state   acetic acid, without water, in 98% solution state   Consequential, S - RER | 201:Manufacture of basic chemicals, fertilizers and nitrogen compounds, plastics / 2011:Manufacture of basic chemicals                    | 0.35134 | kg oil-Eq            |
| <b>ecotoxicity: marine - marine ecotoxicity potential (METP)</b>                                                                   |                                                                                                                                           | 7.45976 | <b>kg 1,4-DCB-Eq</b> |
| market for nickel concentrate, 16% Ni   nickel concentrate, 16% Ni   Consequential, S - GLO                                        | 242:Manufacture of basic precious and other non-ferrous metals / 2420:Manufacture of basic precious and other non-ferrous metals          | 6.58517 | kg 1,4-DCB-Eq        |
| market for electricity,                                                                                                            | 351:Electric power generation, transmission                                                                                               | 0.2903  | kg 1,4-              |

|                                                                                                                                                    |                                                                                                                                           |          |                     |
|----------------------------------------------------------------------------------------------------------------------------------------------------|-------------------------------------------------------------------------------------------------------------------------------------------|----------|---------------------|
| medium voltage   electricity, medium voltage   Consequential, S - IN-Northern grid                                                                 | and distribution / 3510:Electric power generation, transmission and distribution                                                          |          | DCB-Eq              |
| ammonia production, steam reforming, liquid   ammonia, anhydrous, liquid   Consequential, S - UN-SEASIA                                            | 201:Manufacture of basic chemicals, fertilizers and nitrogen compounds, plastics / 2012:Manufacture of fertilizers and nitrogen compounds | 0.2429   | kg 1,4-DCB-Eq       |
| urea                                                                                                                                               | 201:Manufacture of basic chemicals, fertilizers and nitrogen compounds, plastics / 2012:Manufacture of fertilizers and nitrogen compounds | 0.11541  | kg 1,4-DCB-Eq       |
| nitric oxide production   nitric oxide   Consequential, S - GLO                                                                                    | 201:Manufacture of basic chemicals, fertilizers and nitrogen compounds, plastics / 2011:Manufacture of basic chemicals                    | 0.10787  | kg 1,4-DCB-Eq       |
| nitric acid production, product in 50% solution state   nitric acid, without water, in 50% solution state   Consequential, S - RoW                 | 201:Manufacture of basic chemicals, fertilizers and nitrogen compounds, plastics / 2012:Manufacture of fertilizers and nitrogen compounds | 0.09727  | kg 1,4-DCB-Eq       |
| <b>ozone depletion - ozone depletion potential (ODP<sub>infinite</sub>)</b>                                                                        |                                                                                                                                           | 0.00012  | <b>kg CFC-11-Eq</b> |
| nitric acid production, product in 50% solution state   nitric acid, without water, in 50% solution state   Consequential, S - RoW                 | 201:Manufacture of basic chemicals, fertilizers and nitrogen compounds, plastics / 2012:Manufacture of fertilizers and nitrogen compounds | 0.00011  | kg CFC-11-Eq        |
| market for electricity, medium voltage, renewable energy products   electricity, medium voltage, renewable energy products   Consequential, S - CH | 351:Electric power generation, transmission and distribution / 3510:Electric power generation, transmission and distribution              | 6.29E-06 | kg CFC-11-Eq        |
| market for nickel concentrate, 16% Ni   nickel concentrate, 16% Ni   Consequential, S - GLO                                                        | 242:Manufacture of basic precious and other non-ferrous metals / 2420:Manufacture of basic precious and other non-ferrous metals          | 3.46E-06 | kg CFC-11-Eq        |
| <b>particulate matter formation - particulate matter formation potential (PMFP)</b>                                                                |                                                                                                                                           | 0.03493  | <b>kg PM2.5-Eq</b>  |
| nitric oxide production   nitric oxide   Consequential, S - GLO                                                                                    | 201:Manufacture of basic chemicals, fertilizers and nitrogen compounds, plastics / 2011:Manufacture of basic chemicals                    | 0.01795  | kg PM2.5-Eq         |

|                                                                                                                                    |                                                                                                                                           |         |                  |
|------------------------------------------------------------------------------------------------------------------------------------|-------------------------------------------------------------------------------------------------------------------------------------------|---------|------------------|
| urea production   urea   Consequential, S - CN                                                                                     | 201:Manufacture of basic chemicals, fertilizers and nitrogen compounds, plastics / 2012:Manufacture of fertilizers and nitrogen compounds | 0.00569 | kg PM2.5-Eq      |
| market for nickel concentrate, 16% Ni   nickel concentrate, 16% Ni   Consequential, S - GLO                                        | 242:Manufacture of basic precious and other non-ferrous metals / 2420:Manufacture of basic precious and other non-ferrous metals          | 0.00375 | kg PM2.5-Eq      |
| nitric acid production, product in 50% solution state   nitric acid, without water, in 50% solution state   Consequential, S - RoW | 201:Manufacture of basic chemicals, fertilizers and nitrogen compounds, plastics / 2012:Manufacture of fertilizers and nitrogen compounds | 0.00346 | kg PM2.5-Eq      |
| ammonia production, steam reforming, liquid   ammonia, anhydrous, liquid   Consequential, S - UN-SEASIA                            | 201:Manufacture of basic chemicals, fertilizers and nitrogen compounds, plastics / 2012:Manufacture of fertilizers and nitrogen compounds | 0.00325 | kg PM2.5-Eq      |
| acetic acid production, product in 98% solution state   acetic acid, without water, in 98% solution state   Consequential, S - RER | 201:Manufacture of basic chemicals, fertilizers and nitrogen compounds, plastics / 2011:Manufacture of basic chemicals                    | 0.00057 | kg PM2.5-Eq      |
| <b>acidification: terrestrial - terrestrial acidification potential (TAP)</b>                                                      |                                                                                                                                           | 0.15696 | <b>kg SO2-Eq</b> |
| nitric oxide production   nitric oxide   Consequential, S - GLO                                                                    | 201:Manufacture of basic chemicals, fertilizers and nitrogen compounds, plastics / 2011:Manufacture of basic chemicals                    | 0.11368 | kg SO2-Eq        |
| nitric acid production, product in 50% solution state   nitric acid, without water, in 50% solution state   Consequential, S - RoW | 201:Manufacture of basic chemicals, fertilizers and nitrogen compounds, plastics / 2012:Manufacture of fertilizers and nitrogen compounds | 0.01432 | kg SO2-Eq        |
| urea production   urea   Consequential, S - CN                                                                                     | 201:Manufacture of basic chemicals, fertilizers and nitrogen compounds, plastics / 2012:Manufacture of fertilizers and nitrogen compounds | 0.01273 | kg SO2-Eq        |
| market for nickel concentrate, 16% Ni   nickel concentrate, 16% Ni   Consequential, S - GLO                                        | 242:Manufacture of basic precious and other non-ferrous metals / 2420:Manufacture of basic precious and other non-ferrous metals          | 0.00744 | kg SO2-Eq        |
| ammonia production, steam reforming, liquid   ammonia, anhydrous,                                                                  | 201:Manufacture of basic chemicals, fertilizers and nitrogen compounds, plastics / 2012:Manufacture of fertilizers and                    | 0.00635 | kg SO2-Eq        |

|                                                                                                                                                    |                                                                                                                                           |                |                |
|----------------------------------------------------------------------------------------------------------------------------------------------------|-------------------------------------------------------------------------------------------------------------------------------------------|----------------|----------------|
| liquid   Consequential, S - UN-SEASIA                                                                                                              | nitrogen compounds                                                                                                                        |                |                |
| <b>eutrophication: freshwater - freshwater eutrophication potential (FEP)</b>                                                                      |                                                                                                                                           | <b>0.01164</b> | <b>kg P-Eq</b> |
| market for nickel concentrate, 16% Ni   nickel concentrate, 16% Ni   Consequential, S - GLO                                                        | 242:Manufacture of basic precious and other non-ferrous metals / 2420:Manufacture of basic precious and other non-ferrous metals          | 0.00636        | kg P-Eq        |
| nitric oxide production   nitric oxide   Consequential, S - GLO                                                                                    | 201:Manufacture of basic chemicals, fertilizers and nitrogen compounds, plastics / 2011:Manufacture of basic chemicals                    | 0.00124        | kg P-Eq        |
| market for electricity, medium voltage, renewable energy products   electricity, medium voltage, renewable energy products   Consequential, S - CH | 351:Electric power generation, transmission and distribution / 3510:Electric power generation, transmission and distribution              | 0.00109        | kg P-Eq        |
| nitric acid production, product in 50% solution state   nitric acid, without water, in 50% solution state   Consequential, S - RoW                 | 201:Manufacture of basic chemicals, fertilizers and nitrogen compounds, plastics / 2012:Manufacture of fertilizers and nitrogen compounds | 0.00102        | kg P-Eq        |
| urea production   urea   Consequential, S - CN                                                                                                     | 201:Manufacture of basic chemicals, fertilizers and nitrogen compounds, plastics / 2012:Manufacture of fertilizers and nitrogen compounds | 0.001          | kg P-Eq        |
| ammonia production, steam reforming, liquid   ammonia, anhydrous, liquid   Consequential, S - UN-SEASIA                                            | 201:Manufacture of basic chemicals, fertilizers and nitrogen compounds, plastics / 2012:Manufacture of fertilizers and nitrogen compounds | 0.00059        | kg P-Eq        |
| market for wastewater, average   wastewater, average   Consequential, S - RoW                                                                      | 370:Sewerage / 3700:Sewerage                                                                                                              | 0.00025        | kg P-Eq        |
| acetic acid production, product in 98% solution state   acetic acid, without water, in 98% solution state   Consequential, S - RER                 | 201:Manufacture of basic chemicals, fertilizers and nitrogen compounds, plastics / 2011:Manufacture of basic chemicals                    | 0.0002         | kg P-Eq        |
| market for water, deionised   water, deionised   Consequential, S - RoW                                                                            | 360:Water collection, treatment and supply / 3600:Water collection, treatment and supply                                                  | -0.00012       | kg P-Eq        |
| <b>climate change - global warming potential (GWP100)</b>                                                                                          |                                                                                                                                           | <b>31.2141</b> | <b>kg</b>      |

|                                                                                                                                                    |                                                                                                                                           | <b>4</b>     | <b>CO2-Eq</b> |
|----------------------------------------------------------------------------------------------------------------------------------------------------|-------------------------------------------------------------------------------------------------------------------------------------------|--------------|---------------|
| ammonia production, steam reforming, liquid   ammonia, anhydrous, liquid   Consequential, S - UN-SEASIA                                            | 201:Manufacture of basic chemicals, fertilizers and nitrogen compounds, plastics / 2012:Manufacture of fertilizers and nitrogen compounds | 13.6788<br>5 | kg<br>CO2-Eq  |
| nitric acid production, product in 50% solution state   nitric acid, without water, in 50% solution state   Consequential, S - RoW                 | 201:Manufacture of basic chemicals, fertilizers and nitrogen compounds, plastics / 2012:Manufacture of fertilizers and nitrogen compounds | 5.23714      | kg<br>CO2-Eq  |
| nitric oxide production   nitric oxide   Consequential, S - GLO                                                                                    | 201:Manufacture of basic chemicals, fertilizers and nitrogen compounds, plastics / 2011:Manufacture of basic chemicals                    | 4.99495      | kg<br>CO2-Eq  |
| urea production   urea   Consequential, S - CN                                                                                                     | 201:Manufacture of basic chemicals, fertilizers and nitrogen compounds, plastics / 2012:Manufacture of fertilizers and nitrogen compounds | 3.8382       | kg<br>CO2-Eq  |
| market for nickel concentrate, 16% Ni   nickel concentrate, 16% Ni   Consequential, S - GLO                                                        | 242:Manufacture of basic precious and other non-ferrous metals / 2420:Manufacture of basic precious and other non-ferrous metals          | 2.24697      | kg<br>CO2-Eq  |
| acetic acid production, product in 98% solution state   acetic acid, without water, in 98% solution state   Consequential, S - RER                 | 201:Manufacture of basic chemicals, fertilizers and nitrogen compounds, plastics / 2011:Manufacture of basic chemicals                    | 0.64768      | kg<br>CO2-Eq  |
| market for electricity, medium voltage, renewable energy products   electricity, medium voltage, renewable energy products   Consequential, S - CH | 351:Electric power generation, transmission and distribution / 3510:Electric power generation, transmission and distribution              | 0.44588      | kg<br>CO2-Eq  |

29

30
